1 **Title:** Gut feelings begin in childhood: how the gut metagenome links to early environment,  
2 caregiving, and behavior

3

4 **Authors:** Jessica E Flannery<sup>1\*</sup>, Keaton Stagaman<sup>2\*</sup>, Adam R Burns<sup>3</sup>, Roxana J Hickey<sup>4,5</sup>, Leslie  
5 E Roos<sup>6</sup>, Ryan J Giuliano<sup>6</sup>, Philip A Fisher<sup>1</sup>, Thomas J Sharpton<sup>2,7†</sup>

6

7 **Author Affiliations:**

8 <sup>1</sup>Department of Psychology, University of Oregon, Eugene, OR, USA

9 <sup>2</sup>Department of Microbiology, Oregon State University, Corvallis, OR, USA

10 <sup>3</sup>Department of Medicine Division of Infectious Diseases, Stanford University School of  
11 Medicine, Stanford, CA, USA

12 <sup>4</sup>Biology of the Built Environment Center, University of Oregon, Eugene, OR, USA

13 <sup>5</sup>Phylagen, San Francisco, CA, USA

14 <sup>6</sup>Department of Psychology, University of Manitoba, Winnipeg, MB, Canada

15 <sup>7</sup>Department of Statistics, Oregon State University, Corvallis, OR, USA

16 \*Co-first authors

17 †Corresponding author

18

19 **Corresponding author:**

20 Thomas J Sharpton

21 Department of Microbiology

22 Nash Hall 530

23 OSU, Corvallis, OR 97331

24 541-737-8623

25 thomas.sharpton@oregonstate.edu

26

27 **Keywords:**

28 Microbiome, metagenomics, childhood, development, behavior

29

30

31 **ABSTRACT**

32  
33 Psychosocial environments impact normative behavioral development in children, increasing the  
34 risk of problem behaviors and psychiatric disorders across the lifespan. Converging evidence  
35 demonstrates early normative development is affected by the gut microbiome, which itself can be  
36 altered by early psychosocial environments. Nevertheless, these relationships are poorly  
37 understood in childhood, particularly beyond peri- and postnatal microbial colonization. To  
38 determine the gut microbiome's role in the associations between childhood adversity and  
39 behavioral development, we conducted a metagenomic investigation among cross-sectional  
40 sample of early school-aged children with a range of adverse experiences and caregiver stressors  
41 and relationships. Our results indicate that the taxonomic and functional composition of the gut  
42 microbiome links to behavioral dysregulation during a critical period of child development.  
43 Furthermore, our analysis reveals that both socioeconomic risk exposure and child behaviors  
44 associate with the relative abundances of specific taxa (e.g., *Bacteroides* and *Bifidobacterium*  
45 species) as well as functional modules encoded in their genomes (e.g., monoamine metabolism)  
46 that have been linked to cognition and health. We also identified heretofore novel linkages  
47 between gut microbiota, their functions, and behavior. These findings hold important  
48 translational implications for developmental psychology and microbiome sciences alike, as they  
49 suggest that caregiver behavior might mitigate the impact of socioeconomic risk on the  
50 microbiome and modify the relationship between subclinical symptoms of behavioral  
51 dysregulation and the gut microbiome in early school-aged children.

52  
53 **INTRODUCTION**

54  
55 Childhood is a formative period of behavioral development that can influence the  
56 trajectory of psychiatric disorders and problem behaviors across the lifespan (1). Research has  
57 recently clarified the profound impact that a child's economic, social, and caregiving  
58 environment plays in determining such outcomes (2, 3). For example, exposure to environmental  
59 risks early in life, such as growing up under low socioeconomic status (e.g., low income to needs  
60 ratio) or experiencing high family disruption and turmoil, can increase the risk for children to  
61 develop psychiatric disorders and associated problem behaviors (4). Caregivers, however, are  
62 one of the most proximal influences on and predictors of child wellbeing, and can modify how  
63 socioeconomic risk environments impact the child's neurobiological and behavioral development  
64 (5). Across species, caregivers serve to protect their offsprings' developing biology from  
65 environmental stressors and modify childhood behavioral response to adverse economic and  
66 social environments (3). Responsive and predictable caregiver behaviors are linked to improved  
67 child outcomes (6). Conversely, negative caregiver behaviors, such as perceived parental stress  
68 or disrupted parent-child relationships, can leave children more vulnerable to biological  
69 perturbations and behavioral dysregulation problems (7). Identifying early risk factors or  
70 correlates of childhood behavioral dysregulation is particularly important given that childhood is  
71 a time when mental health symptoms begin to emerge.

72 Ongoing research is focusing on understanding the underlying mechanisms by which  
73 adverse environments and caregiving behaviors (both positive and negative) influence a child's  
74 behavioral development. Such research demonstrates that these factors can alter the  
75 developmental trajectory of central, autonomic and peripheral nervous systems function (8).  
76 These efforts have helped to influence not only the design of subsequent interventions (9), but  
77 also policy and practice (10).

78 Similarly, emerging research indicates that the gut microbiome may play a critical role in  
79 determining how a child's environment ultimately impacts both their neurobiological function  
80 and mental health outcomes (11). The gut microbiome (hereafter "microbiome") is the  
81 community of microbes that reside within the gastrointestinal tract and may be a key, yet  
82 relatively under-studied driver of neurobiological and behavioral development. Animal  
83 experiments demonstrate that the microbiome communicates with the central nervous system to  
84 influence social, explorative, and affective behavior through several pathways, including  
85 neuroendocrine and immune system coordination, vagal nerve stimulation, and neurotransmitter  
86 metabolism [see (12) for review of mechanisms]. These successional dynamics of the  
87 microbiome's colonization are increasingly understood to interact with and shape the trajectory  
88 of neurobiological development (13). However, limited research has investigated the  
89 microbiome's relationship to behavioral dysregulation and to key environments influences such  
90 as socioeconomic risk and caregiver behaviors during childhood (14–16).

91 Although we understand substantially less about the microbiome's relationship with  
92 behavioral dysregulation early in life in humans, recent work links the composition of the  
93 microbiome to infant and toddler behaviors, such as surgency/extroversion, fear (15), and  
94 cognitive development (16). In addition, preliminary evidence from human studies of autism  
95 spectrum disorder suggests that the microbiome continues to play an active role in behavioral  
96 development following the first few years of initial gut colonization (17). It remains unclear if  
97 the microbiome associates with other forms of behavioral dysregulation and if it links to the  
98 onset of psychiatric disorders and problem behaviors. Understanding the link between the gut  
99 microbiome and subclinical behavioral dysregulation is particularly important given that  
100 normative behavior and behavioral disruptions develop throughout childhood, and that this  
101 period of development offers opportunities to intervene and treat disorders as they emerge.

102 Extensive evidence points to the microbiome's sensitivity to psychosocial environments  
103 (18). Socioeconomic risk as well as caregiving behaviors during the initial programming of the  
104 microbiome can lead to long term changes in the microbiome and symptoms of behavioral  
105 dysregulation. For example, rodent pups that experienced an early life stressor of low resources,  
106 a model designed to mimic low socioeconomic status (SES), exhibited altered microbial  
107 compositions, increased intestinal permeability, and increased anxiety-like behaviors in  
108 adulthood relative to controls (19). Similarly, human adults from lower SES backgrounds  
109 exhibited lower microbial diversity (20).

110 Ample evidence suggests that caregiver behaviors influence the development of the  
111 microbiome and may modify how adverse environments impact the microbiome and subsequent  
112 childhood outcomes. In both humans and primates, prenatal physiological stress and a negative  
113 mother-infant relationship appear to reduce the level of Bifidobacteria and Lactobacilli in the  
114 infant's microbiome (21, 22). Similarly, rodent pups exposed to repeated, prolonged maternal  
115 separation experience altered gut microbial profiles and increased intestinal permeability  
116 following social stressors in adulthood (23). The role of socioeconomic risk and caregiver  
117 behaviors on the developing microbiome remains notably understudied, and it is unclear if these  
118 relationships remain beyond the first few years of life.

119 Based on this prior research, we undertook an investigation of the microbiome's link to  
120 socioeconomic risk, caregiving behaviors (both positive and negative), and child behavioral  
121 dysregulation. The goal of this study was to determine if and how the microbiome relates to  
122 environmental factors and behavioral dysregulation symptoms in early school-age children (4-7  
123 years old; See Supplemental Table 1 for all sample metadata). Most studies of the microbiome's

124 relationship with behavioral dysregulation leverage 16S rRNA gene sequencing to determine  
125 how the taxonomic composition of the microbiome relates to environmental factors or behavioral  
126 problems and/or mental health outcomes in other populations (16). While this technique offers  
127 powerful insight into the kinds of taxa that constitute the microbiome, it offers no direct  
128 information about the functional mechanisms that they may utilize to respond to environmental  
129 factors or physiology.

130 In contrast, the approach employed in the present study, a technique known as shotgun  
131 metagenomics (24), alternatively involves simultaneously sequencing the genomes of taxa that  
132 compose the microbiome. In so doing, it offers insight not only into who resides in the gut, but  
133 also clarifies which functional pathways are encoded in their genomes. We generated shotgun  
134 metagenomic data from a cohort of children and determined how both the microbial taxa and the  
135 specific genetic functions they encode associate with subclinical child behavioral dysregulation  
136 symptoms (hereafter “behavioral dysregulation”), socioeconomic risk, and caregiver behaviors.  
137 We first tested if concurrent socioeconomic status influenced the child microbiome and whether  
138 self-reported parental behaviors statistically interacted with this association to explain additional  
139 variance. In addition, we examined how the child microbiome is associated with parent-reported  
140 child internalizing and externalizing behaviors, and whether caregiver behavior statistically  
141 moderated this association. Finally, we investigated if there were specific microbial taxa and  
142 metabolic pathways associated with different metrics of socioeconomic risk and child behavioral  
143 dysregulation. To our knowledge, this is the first study to assess the linkage between the  
144 microbiome, a child’s environment, and behavioral dysregulation symptoms during the 4-7 year  
145 old age range of formative behavioral and biological development. In so doing, this study reveals  
146 that exogenous factors including parental behavior impact the gut microbiome during the first  
147 few years of life, and that the microbiome indicates behavioral dysregulation, even at subclinical  
148 thresholds.

## 149 **RESULTS**

150  
151  
152 In order to measure the microbiome, we collected stool from 40 children from a mid-size  
153 city in the Pacific Northwest that were already participating in a larger study (25). Parents of the  
154 children filled out questionnaires regarding five covariate categories: socioeconomic risk,  
155 behavioral dysregulation, caregiver behavior, demography, and gut-related history (i.e., factors  
156 known to influence microbiome composition such as antibiotic use). DNA was extracted from  
157 the fecal samples, sequencing libraries were prepared, and shotgun metagenomic sequencing was  
158 conducted according to standard protocols (see Methods). Unique metagenomic sequences were  
159 assigned, if possible, to the bacterial species level which resulted in 213 unique taxon  
160 assignments after quality control. Using these assignments, we estimated the taxonomic  
161 composition of the microbiome. Sequences were also assigned to molecular functional groups  
162 using the Kyoto Encyclopedia of Genes and Genomes (KEGG) database. These assignments are  
163 referred to as KEGG orthologs (KOs), and represent individual functions within larger genomic  
164 modules, which are components of functional pathways. The sequence set was assigned to  
165 13,183 unique KOs, after quality control. Using these taxonomic and functional assignments, we  
166 constructed community tables (matrices of taxon or KO relative abundances by sample) to test  
167 associations between the microbiome and our covariates of interest in a statistically rigorous  
168 manner (see Methods and Supplemental Methods for specific details regarding participants,  
169 sample collection, molecular methods, and sequence analysis).

170 Because the questionnaires filled out by parents encompassed more potential covariates  
171 (52) than microbiome samples ( $n = 40$ ), we began our analysis by selecting the covariates within  
172 each covariate category that explained a statistically significant amount of variance in the  
173 microbiome composition between samples (see Methods). This covariate selection process  
174 returned an identical set of ten covariates for both taxonomic and functional composition (See  
175 Table 1). In order to test our hypotheses that socioeconomic risk, behavioral dysregulation, and  
176 caregiver behavior covariates significantly associate with the composition of the microbiome, we  
177 utilized a constrained correspondence analysis (CCA) to create ordinations. This method is  
178 particularly appropriate for our study design because it accounts for the variance in the  
179 microbiome explained by factors that prior research indicates may have a strong effect on the  
180 composition of the microbiome, but which are not the direct focus of this research (i.e.,  
181 demography and gut-related history). We then ran a permutational analysis of variance  
182 (PERMANOVA) on the remaining, unexplained variance to test the significance of the  
183 relationships between covariates and the composition of the microbiome. Selected covariates  
184 within each category (e.g., demography, gut-related history, child dysregulation behaviors,  
185 socioeconomic risk, and caregiver behavior) were determined by the *envfit* model. For each set  
186 of covariates, we tested their association with both the taxonomic (species) and functional (KO)  
187 composition of the microbiome.

#### 188 189 Microbiome Composition, Socioeconomic Risk, and Caregiver Behavior

190  
191 We first examined whether metrics of socioeconomic risk and caregiver behavior  
192 significantly explain the observed variance in overall microbiome diversity and composition. In  
193 addition, we investigated whether these associations manifested at the level of the taxonomic  
194 identities of the microbiome constituents or the functional potential of the metagenome. We  
195 started by testing the associations between the taxonomic composition of the microbiome and the  
196 selected socioeconomic risk and caregiver behavior covariates. To maximize scientific rigor, we  
197 constructed a CCA model, which is based on a Euclidian distance, that first accounted for the  
198 selected demography (child ethnicity) and the selected gut-linked covariates (previously shown  
199 to influence gut [25–28]; geographic location) by determining the amount of variance explained.  
200 These two demography and gut history covariates accounted for 19.9% of the total variance in  
201 taxonomic composition. The socioeconomic risk and caregiver behavior covariates that remained  
202 in the best model (according to Akaike Information Criterion) explained a further 18.5% of the  
203 variance, leaving 61.6% of the variance unexplained. A PERMANOVA test on this CCA model  
204 revealed a single significant association. Specifically, the taxonomic composition of the gut  
205 microbiome taxonomic was associated with the selected socioeconomic risk covariate (number  
206 of family turmoil associated life events;  $F = 1.61$ ,  $p = 0.0094$ ; Fig 1A, Supplemental Table 2).  
207 Additionally, the selection of the best model included an interaction between Poverty Events  
208 (number of poverty-associated life events) and Parent-Child Dysfunction (parenting stress index  
209 subscale), but after controlling for gut-history and demography covariates, it was not significant  
210 ( $F = 1.39$ ,  $p = 0.073$ ).

211 As noted previously, the metagenomic (as opposed to amplicon-based) methodology we  
212 employed made it possible to test the associations between socioeconomic risk, caregiver  
213 behavior, and the *functional composition* of the microbiome. As in the prior analyses, we set the  
214 two demography and gut-related history covariates as conditional variables, which explained  
215 25.7% of the total variance in functional composition. The socioeconomic risk and caregiver



216 behavior covariates that remained in the best model accounted for 28.5% of the total variance in  
217 functional composition, while 45.8% remained unexplained. A PERMANOVA test on this  
218 model found that the caregiver covariate Parent-Child Dysfunction significantly interacted with  
219 both Turmoil Events ( $F = 2.51, p = 0.0097$ ; Fig 1C) and Income to Needs Ratio (measure of  
220 poverty;  $F = 1.86, p = 0.041$ ; Fig 1D, Supplemental Table 3). These results provide evidence  
221 that, in terms of the microbiome's functional potential, caregiver behavior can moderate the  
222 associations between socioeconomic risk covariates and the microbiome.

223

### 224 Microbiome Composition, Behavioral dysregulation, and Caregiver Behavior

225

226 In order to address our second question, whether metrics of behavioral dysregulation and  
227 caregiver behavior significantly explain the observed variance in overall microbiome diversity  
228 and composition, we applied the same analysis pipeline as above, substituting the selected child  
229 behavioral dysregulation symptom covariates for the socioeconomic risk covariates. The analysis  
230 of the taxonomic composition of the microbiome revealed no significant associations  
231 (Supplemental Table 4).

232 For the functional composition of the microbiome, we again found that the caregiver  
233 behavior covariate Parent-Child Dysfunction significantly interacted with two child behavioral  
234 dysregulation symptom covariates: depression (Depressive Problems;  $F = 2.69, p = 0.0079$ ; Fig.  
235 2A) and ability to inhibit impulses (Inhibitory Control;  $F = 2.18, p = 0.038$ ; Fig. 2B,  
236 Supplemental Table 5). Again, these results provide evidence that the microbiome is associated  
237 with certain behavioral dysregulation, and that caregiver behavior may moderate these  
238 associations. For this particular study sample, however, the evidence suggests that it is the  
239 composition of functional groups within the microbiome, more so than the taxonomic  
240 composition of the microbiome, which correlates with behavioral dysregulation and caregiver  
241 behavior.

242

### 243 Individual Taxa, KOs and Socioeconomic Risk, Child Behavioral Dysregulation Symptom 244 Covariates

245

246 The above analyses assessed covariates of the overall composition and diversity of the  
247 gut microbiome. To obtain a finer resolution on the interactions between the gut microbiome,  
248 socioeconomic risk, and behavioral dysregulation, we employed a pairwise compound Poisson  
249 generalized linear models (CPGLM) to regress a specific taxon or KO relative abundance in the  
250 gut against each socioeconomic risk or behavioral dysregulation covariate. A comprehensive set  
251 of results of the pairwise relationships that maintained significance after false discovery rate  
252 (FDR) correction can be found in Supplemental Tables 6 & 7. Briefly, we found 67 significant  
253 pairwise relationships between covariates and taxa identified at the species level (48 for  
254 behavioral dysregulation, 19 for socioeconomic risk covariates; Fig. 3). For these taxon-covariate  
255 relationships, we found numerous associations involving butyrate-producing bacteria, and  
256 specific taxa of particular interest, including *Bacteroides fragilis* and *B. thetaiotaomicron*, which  
257 have demonstrated anti-inflammatory effects in mice and humans (30). We found significant  
258 relationships between 7 socioeconomic risk and 13 child behavioral dysregulation symptom  
259 covariates and 695 functions defined at the KO level. Of these 695 pairwise results, 94 KOs were  
260 grouped within defined metabolic modules (Fig. 4). Consistent with prior studies, for the KO-  
261 covariate relationships we found numerous associations involving monoamine metabolism

262 (including tryptophan, tyrosine, glutamate, and leucine) and inter-microbe antagonism (type VI  
263 secretion systems and lipopeptide antibiotics).

264

## 265 **DISCUSSION**

266

267 The present study provides novel insights into the relationship between the gut  
268 microbiome and both the psychosocial environment and behavioral dysregulation in a cross-  
269 sectional sample of early school-aged children (Figure 5). Furthermore, this is the first study to  
270 assess if caregiving behaviors (i.e., perceived parental stress) can statistically modify the child's  
271 gut microbiome's association with their level socioeconomic risk exposure and behavioral  
272 dysregulation. As such, if replicated, the work provides a potentially new avenue of research into  
273 the mechanisms of behavioral intervention in future research. These results provide supportive  
274 evidence that the psychosocial environment continues to shape not only the taxonomic  
275 composition, but also the functional potential of the microbiome beyond initial gut microbial  
276 colonization that occurs in the perinatal period. Notably, the behavioral dysregulation symptoms  
277 measured in this study occurred at thresholds not necessarily indicative of psychiatric disorders  
278 of childhood. That these relationships were observed at subclinical levels of behavioral  
279 dysregulation symptoms suggests that the microbiome may play a role in the emergence of  
280 dysregulated behavior (i.e., providing early associative relationships prior to reaching clinical  
281 thresholds), rather than simply being present in clinical populations.

282 Importantly, this study also documented that the quality of the caregiver-child  
283 relationship may moderate the microbiome's association with both socioeconomic risk and  
284 behavioral dysregulation. Because our study relied on correlational methods, it is possible that is  
285 in fact the socioeconomic risk and the behavioral dysregulation symptoms that are moderating  
286 the association between the microbiome and caregiver behavior. However, given that none of the  
287 statistical tests support a significant main effect of caregiver behavior, but there is at least one  
288 significant association between both socioeconomic risk and behavioral dysregulation symptoms  
289 and the microbiome, it is plausible to conclude that the caregiver-child relationship may  
290 moderate the microbiome's association with the other covariate groups rather than the other way  
291 around. That said, future work should seek to disentangle these relationships.

292 These findings have important implications for developmental psychological and  
293 developmental microbiome sciences alike, suggesting that the microbiome may be a pathway by  
294 which caregiver behavior may mitigate the impact of socioeconomic risk and influence early  
295 school-aged child outcomes. Caregivers may influence the microbiome in childhood through  
296 reducing or exacerbating their child's experience of psychosocial stress. For example, increased  
297 parental stress that results from reduced economic or social support may in turn increase the  
298 child's stress. Conversely, supportive parenting can reduce a child's physiological and perceived  
299 stress, which may protect the microbiome from perturbations related to the physiology of stress.  
300 Furthermore, the metrics of caregiver behavior assessed in this study may be correlated with  
301 other symptoms of behavioral dysregulation, such as the home environment and diet of the child  
302 that may alter the composition and diversity of the gut microbiome (31, 32). Alteration of the  
303 child microbiome through the home environment and diet may in turn influence the level of  
304 physiological stress response in the child.

305 While we detected a significant association between parent-reported family turmoil and  
306 the taxonomic composition of the microbiome, we cannot conclude that caregiver behavior  
307 moderates this association, as there was no significant interaction between these variables. Due  
308 to our sample size, we cannot rule out that this study may have been underpowered to detect this

309 relationship. However, as shown in Figures 1B & C (Supplemental Table 3), in terms of the  
310 functional composition of the microbiome, there were significant interactions between parent-  
311 reported parent-child dysfunction and two metrics of socioeconomic risk: income-to-needs ratio  
312 and family turmoil. Therefore, we found supportive evidence that the dysfunctionality of the  
313 parent-child relationship moderates the nature of the relationship between both economic and  
314 social forms of adversity and the functional potential of the gut microbiome of a child. This  
315 underscores the potential for caregivers to mitigate the impact of socioeconomic risk exposure on  
316 the developing gut microbiome. One mechanism by which socioeconomic risk may influence the  
317 microbiome is by exposing the child to different environmental microbes. For example, for  
318 modernized urban populations, there is evidence that greater socioeconomic status affords people  
319 the ability to travel away from human-dominated environments and gain exposure to microbe  
320 associated with the natural environment. Such differences in microbial exposure in early  
321 development associate with different profiles of immune function (33). Furthermore, adverse  
322 postnatal environments that are often comorbid with socioeconomic risk, such as frequent  
323 antibiotic use or toxin exposure, associate with altered microbial composition and intestinal  
324 permeability (34, 35). Future work should build upon these findings to test if the microbiome  
325 may serve as a mechanism by which economic and social adversity (socioeconomic risk)  
326 influences behavioral dysregulation.

327 When we tested whether the relationship between the gut microbiome and behavioral  
328 dysregulation depended on the parent-child relationship, our analyses only found significant  
329 interactions for the functional potential of the microbiome (Fig. 2A & B; Supplemental Table 5).  
330 In this case, the nature of the relationships between the functional microbiome and two  
331 behavioral dysregulation -- depressive problems and inhibitory control -- were modified by the  
332 quality of the parent-child relationship. This is consistent with prior literature that indicates  
333 behavioral dysregulation in childhood spans internalizing and externalizing dimensions (36).  
334 Again, the lack of any significant behavioral dysregulation for the taxonomic microbiome may  
335 indicate either that this study is underpowered at the taxonomic level or that these relationships  
336 are more dependent on the metabolic capabilities of the whole microbiome rather than attributes  
337 associated with specific taxa. In either case, it suggests that intervening to improve the parent-  
338 child relationship may influence the functional potential of the microbiome more strongly than  
339 its taxonomic composition. One proposed way that humans mothers may help regulate the gut-  
340 brain-microbiota axis is through skin-to-skin contact, particularly with high-risk infants (i.e.,  
341 preterm; [31]. Future work should seek to tease apart the mechanisms by which parenting  
342 behaviors may influence the microbiome in later periods of development.

343 In addition to assessing the relationship between the selected covariates and the  
344 microbiome as a whole, we sought to understand such relationships at a finer scale of resolution.  
345 Therefore, we conducted pairwise comparisons between covariate scores and the abundances of  
346 each taxon and KO to determine whether there were specific relationships between  
347 socioeconomic risk or behavioral dysregulation and specific taxa or functions found to be  
348 important in previous studies (Figs. 3 & 4, Supplemental Tables 6 & 7). The taxon that  
349 associated with the greatest number of socioeconomic risk and behavioral dysregulation  
350 covariates was *Bacteroides fragilis*. Interestingly, *B. fragilis* associated with reduced levels of  
351 aggression, anxiety, emotional reactivity, externalizing behavior, impulsivity, and an increase in  
352 inhibitory control (i.e., better mental health). It was also associated with lower reported incidents  
353 of family turmoil. *B. fragilis* has been shown, in mice, to modulate the mammalian immune  
354 system and protect against pathogen-induced inflammation, specifically through the production



355 of polysaccharide A (30, 37). *B. thetaiotaomicron* has also been shown to have anti-  
356 inflammatory effects in the mammalian intestine, and it too associates with decreases in  
357 externalizing behavior, as well as the overall score for negative behavioral dysregulation (38).  
358 Recent psychological research has provided strong evidence for a relationship between chronic  
359 intestinal inflammation and depression/anxiety (39, 40). The inflammation-depression  
360 relationship, therefore, is a likely mechanism linking decreases in negative behaviors and the  
361 abundance of these anti-inflammatory *Bacteroides* species.

362 Of the taxa that significantly associated with significant socioeconomic risk or behavioral  
363 dysregulation, three taxa belong to species containing known butyrate producers. The production  
364 of butyrate from plant-derived polysaccharides by the gut microbiome is understood to be an  
365 important mechanism through which high-fiber diets promote beneficial health effects. There  
366 are, however, only certain taxa that have the ability to produce butyrate (41). Surprisingly, two of  
367 the butyrate-producing species in our samples, *Coprococcus comes* and *Eubacterium rectale*,  
368 positively associated with elevated anxious-depression and reduced inhibitory control,  
369 respectively. This observation defies our expectation given that prior work points to butyrate's  
370 important role in maintaining gut health and behavior dysregulation (42). It is possible that these  
371 taxa carry other functions that overwhelm the effects of their butyrate production on symptoms  
372 of behavioral dysregulation, or that overall butyrate production is reduced even though the  
373 relative abundances of these two taxa are high in certain microbiomes, or that butyrate  
374 production links to adverse behaviors under some contexts. On the other hand, the third butyrate-  
375 producing taxon in our samples, *Roseburia inulinivorans*, associated with a decrease in  
376 depressive problems and internalizing behavior. This is consistent with prior literature that  
377 suggests that increases in butyrate production improve overall mental health (42). Future work  
378 should seek to disentangle butyrate's specific role in mediating behavioral dysregulation and  
379 how its production by different taxa or in conjunction with different diets impacts this role.

380 In addition to the significant associations between the selected covariates and specific  
381 taxa, our analyses also linked these covariates to specific microbiome functions at the module  
382 and KO levels (Fig. 4; Supplemental Table 7). In particular, we found significant associations  
383 between a number of covariates and pathways involved in the bacterial Type VI secretion system  
384 (T6SS). Research into the psychology of depression has unveiled a possible link between  
385 depression/anxiety and chronic low-grade inflammation in the gut, suggesting a role for the  
386 microbiome in contributing to such disorders (39, 40). One possible mechanism for generating  
387 inflammation is dysbiosis caused by invading pathogens. For example, both *Vibrio* and  
388 *Salmonella* species can use the T6SS to attack commensal bacterial species and establish in the  
389 vertebrate gut (43, 44). Furthermore, T6SS have been shown to directly generate intestinal  
390 inflammation in a mouse model (45). We found that the abundances of three KOs assigned to a  
391 T6SS module, as well as a few KOs with possible T6SS homology, significantly associated with  
392 the increase in scores for aggression, anxiety, anxious-depression, depression, internalizing  
393 behavior, and number of turmoil-related life events. To determine if T6SS-associated KOs  
394 correlated with the abundances of any known T6SS-carrying taxa, we ran a similar CPGLM  
395 regression analysis as before (Supplemental Figure 1). We compared the abundances of all taxa  
396 and the five T6SS-assigned KOs. We found a number of taxa belonging to genera that we would  
397 expect, from prior investigations of their genomes, to carry T6SS such as *Bacteroides*,  
398 *Parabacteroides*, and *Escherichia* (46, 47). However, we also found significant associations with  
399 taxa assigned to genera with no documented cases, to our knowledge, of T6SS production, such  
400 as *Collinsella* and *Alistipes*. Future studies will be needed to elucidate whether type VI secretion

401 systems have direct or indirect effects on the gut-brain axis and which taxa in the gut carry these  
402 systems.

403 In addition to T6SS, other mechanisms of inter-microbial competition also significantly  
404 associated with behavioral dysregulation. These associations included KOs assigned to  
405 functional groups involved in the synthesis of putative lipopeptide antibiotics (e.g. fengycin—an  
406 anti-fungal—and arthrofactin). These antibiotic-assigned KOs associated with the same set of  
407 behavioral dysregulation as the T6SS KOs, with the addition of emotional reactivity, decreased  
408 inhibitory control, and externalizing rather than internalizing behavior. Synthesis of lipopeptide  
409 antibiotics also significantly associated with adversity, such as family separation and poverty.  
410 The increase in these putative functions may indicate an increase in inter-microbial antagonism.  
411 This could possibly be due to invasion by pathogens, which could lead to intestinal inflammation  
412 that underlies their relationship with behaviors such as depression and anxiety.

413 Intriguingly, we also found relationships between both socioeconomic risk and  
414 behavioral dysregulation and microbial functional groups that have been implicated in modifying  
415 behaviors or cognitive function. For example, we discovered associations between these  
416 covariates and various KOs and modules associated with metabolism of monoamines that are  
417 often used as, or are common precursors to, neurotransmitters and neurohormones. We also  
418 found 8 covariates (7 behavioral, 1 socioeconomic risk) positively associated with modules  
419 involved in biosynthesis of melatonin from metabolism of tryptophan. Tryptophan is an essential  
420 amino acid, meaning it must be derived from the diet, and therefore the concentrations of  
421 available tryptophan can feasibly be altered by microbial metabolism (48). Indeed, many studies  
422 have found a relationship between symptoms of depression and anxiety and the availability of  
423 peripheral tryptophan (39, 49, 50). As a specific example, it has been shown that germ-free mice  
424 have greater plasma concentrations of tryptophan (49, 51), greater concentrations of  
425 hippocampal serotonin levels, and a lower kynurenine to tryptophan ratio (a common marker of  
426 tryptophan degradation; (49). Furthermore, germ-free mice were shown to have reduced levels of  
427 anxiety, as compared to conventional mice. Their anxiety, along with their kynurenine to  
428 tryptophan ratio, normalized after colonization with a conventional microbiome, presumably due  
429 to the introduction of taxa capable of metabolizing tryptophan and making it unavailable to the  
430 host (49). We found that the abundances of two KOs associated with degradation of tryptophan  
431 correlate with increases in behaviors including aggression, anxiety, anxious-depression, and  
432 impulsivity, as well as increases in exposure to adverse life events involving family separation,  
433 illness, and poverty. Moreover, we observed a KO involved in tryptophan biosynthesis that  
434 correlated with a decrease in life events related to family illness or injury.

435 Additionally, we detected significant associations between covariates and the metabolism  
436 of other notable monoamines such as glutamate (52–54), leucine (53, 55), and glutamine (56).  
437 Glutamate is the most abundant excitatory neurotransmitter in the vertebrate central nervous  
438 system as well as the most abundant amino acid in their diets (57). While dietary glutamate has  
439 not been linked to any neuropathology, the excitatory effects of glutamate have been linked to  
440 neurodegenerative disorders such as motor neuron disease (MND) or amyotrophic lateral  
441 sclerosis (ALS), Huntington’s disease, Parkinson’s disease and Alzheimer’s disease (57).  
442 Another monoamine, leucine can relatively easily pass through the blood brain barrier, where  
443 astrocytes convert it into glutamate (58, 59). Glutamine is also a precursor to glutamate, but is  
444 also directly involved in the maintenance of a healthy gut and its response to injury (60).  
445 Therefore, it is possible that the effect of the microbiome on the abundance of these monoamines  
446 may play a role in influencing the gut-brain axis.

447 Notably, these findings provide the foundation for future studies to replicate with larger  
448 samples and to assess longitudinal changes to better tease apart causal relationships.  
449 Additionally, this study offers a fundamental step toward translating animal models to sensitive  
450 periods of human development, and it provides a proof of concept to determine if the  
451 microbiome is linked to behavioral dysregulation and socioeconomic risk. Importantly, diet  
452 could be an important factor that confounds the relationships between the gut microbiome and  
453 socioeconomic risk or parent behavior. Properly interrogating the role of diet would require  
454 meticulously monitored diets, which was beyond the scope of the current study. Future work  
455 should build upon these findings to specifically interrogate the impacts of diet. If diet proved to  
456 be a mechanism driving these relationships, it could provide a targeted direction to include  
457 within psychosocial intervention designs.

## 458 459 **CONCLUSION**

460  
461 We tested associations between socioeconomic risk, child behavioral dysregulation, and  
462 the microbiome in terms of both taxonomic and functional composition in a cross-sectional  
463 sample 4-7 years old. In doing so, we discovered that not only are there significant associations  
464 between metrics of socioeconomic risk and behavioral dysregulation with the microbiome, but  
465 that the quality of caregiver behavior statistically moderated these relationships. Furthermore, we  
466 uncovered associations between individual taxa (e.g., *B. fragilis*) and functional groups (e.g.  
467 monoamine metabolism) within the microbiome and metrics of socioeconomic risk and  
468 behavioral dysregulation. These taxa and functional groups potentially, if replicated, represent  
469 mechanisms through which the microbiome associates with socioeconomic risk and behavioral  
470 dysregulation and possibly even targets for future intervention studies to investigate to improve  
471 children's mental health outcomes.

472 The results of this study suggest that, when examining the trajectory of child  
473 psychological development, we need to consider biology, physiology, psychosocial environment,  
474 and the microbiome. All of these can have mutual effects, indicating that the way in which one  
475 factor impacts the psychological development of a child may change depending on the nature of  
476 one or more of the other relationships. Future studies, utilizing both human and animal models,  
477 should seek to tease apart specific behavioral links with the microbiome and extend this design  
478 to a wider range of behavioral symptomatology and socioeconomic risk.

## 479 480 **MATERIALS AND METHODS**

### 481 482 Sample Collection

483  
484 Parents were instructed to collect a small stool sample from their child using a clean  
485 plastic collection device and OMNIgene-Gut collection tube (DNA Genotek, Ottawa, ON,  
486 Canada). Collection tubes were packaged and mailed at ambient temperature to the University of  
487 Oregon (Eugene, OR), where they transferred to -80°C upon receipt. See Supplemental Methods  
488 for greater detail, including measures of diet and health.

### 489 490 Questionnaires

491  
492 *Socioeconomic Risk* were indexed using metrics of socioeconomic status and the Life  
493 Events Checklist (LEC; (61)). The Life Events Checklist was used to provide an index adverse

494 home environment exposure. This provides a total score, and subscales to identify specific  
495 components of adverse life events. Subscales included poverty, turmoil, family illness,  
496 neighborhood violence, family separation, and an overall total score. Household poverty was  
497 indexed by incomes-need-ratio. See Supplemental Methods for range, mean and SD of subscales.  
498

499 *Behavioral dysregulation* were indexed using two previously validated parent-report  
500 measures: the Child Behavior Questionnaire (CBQ; (62)) and the Child Behavior Checklist  
501 (CBCL; (63)). Given childhood is a period in which behavioral dysregulation symptoms shares  
502 common risk factors and less differentiation across both internalizing and externalizing  
503 dimensions of disorders than typically discussed in adult samples, we included both internalizing  
504 (e.g., depression, anxiety) and externalizing (e.g., inhibitory control, aggression) symptoms in  
505 our analyses. Subscales of interest included anxiety problems, depression, emotional  
506 reactivity, anxious depressed, internalizing total, aggressive behavior, externalizing total, overall  
507 total score, and inhibitory control. See Supplemental Methods for range, mean and SD of  
508 subscales.  
509

510 *Caregiver Behavior* was indexed via parent-report Parenting Stress Index (PSI; (64))  
511 Interpersonal Mindfulness in Parenting (IEM-P; (65)), and the Five Factor Mindfulness  
512 Questionnaire (FFMQ; (66)). These questionnaires provided a range of perceived parental stress  
513 and wellbeing, both in general and within the parent-child relationship. See Supplemental  
514 Methods for range, mean and SD of subscales.  
515

#### 516 DNA extraction and sequencing

517

518 DNA was extracted from 250  $\mu$ l aliquots of the OMNIgene-Gut samples using the MoBio  
519 PowerLyzer PowerSoil kit (Qiagen, Hilden, Germany) with the following protocol  
520 modifications: following the addition of solution C1, a 1-minute bead-beating step was  
521 performed on a Mini-BeadBeater-96 (BioSpec Products, Bartlesville, OK, USA), followed by a  
522 10-minute incubation at 65°C; in the final step DNA was eluted in two stages for a combined  
523 total of 100  $\mu$ l.  
524

#### 525 Metagenomic analyses

526

527 Raw metagenome sequences were prepared for analysis using the shotcleaner workflow  
528 (67), which follows the Human Microbiome Project Consortium data processing guidelines (68).  
529 All raw sequences can be accessed through the NCBI at BioProject PRJNA496479, and the code  
530 for all analyses can be accessed at [https://github.com/kstagaman/flannery\\_stagaman\\_analysis](https://github.com/kstagaman/flannery_stagaman_analysis).  
531 Briefly, low quality sequences are trimmed or removed, sequences matching to the human  
532 genome are discarded, and identical sequences are collapsed into a single read. As additional  
533 quality control, we removed 3 of 40 fecal samples due to poor sequencing coverage (coverage  
534 range of removed samples: 19,013 to 23,743; coverage range of remaining samples: 3,499,106 to  
535 15,776,004). These high-quality sequences were then run through shotmap (67) to quantify  
536 KEGG Orthology (KO) group relative abundance and metaphlan2 to quantify taxon relative  
537 abundance (69). All resulting data and the sample metadata (Supplemental Table 1) were  
538 analyzed in R (70).



539 We applied a data reduction technique to minimize the number of covariates considered  
540 in our subsequent analyses. This process is important to reduce the potential for model  
541 overfitting given the large number of covariates relative to the number of samples measured in  
542 our study. Using the *ordinate* function from the phyloseq package (71), we generated a PCoA  
543 ordination based on the Bray-Curtis dissimilarities for both the functional (KO) and taxonomic  
544 communities (Supplemental Figure 2). Briefly, we applied the *envfit* function (72) to Bray-Curtis  
545 dissimilarity-based PCoAs of microbiome taxonomy (species level) or functional capacity and  
546 identified covariates that explained a significant amount of variation across individuals  
547 (Supplemental Figures 3 & 4). Despite being analyzed independently, an identical set of 10  
548 significant covariates best explained the taxonomic and functional variation among individuals.  
549 This finding is unsurprising given the strong correlation between taxonomic and functional beta-  
550 diversity (Procrustes  $r \approx 0.84$ ,  $p < 0.0001$ ; Supplemental Table 8). The significant covariates  
551 used in our successive analyses are defined in Table 1. See Supplemental Methods for additional  
552 details.

553 We utilized a constrained correspondence analysis (CCA; *cca* function; (72)) to  
554 determine the variance in microbiome composition (functional and taxonomic) that covariates  
555 within the socioeconomic risk, child behavioral dysregulation, and caregiver behavior categories  
556 explained. The CCA method is useful in this case because it allows us to first account for the  
557 variance in microbiome composition explained by demographic and gut-related covariates,  
558 which might otherwise confound our analysis, before assessing the variance explained by the  
559 covariates of interest for this study. We assessed the significance of associations between the  
560 selected covariates and the microbiome using a permutational ANOVA (PERMANOVA)  
561 analysis (*anova.cca* function; (72)) on the resulting CCA ordination.

562 To determine if the *envfit*-selected caregiver behavior covariate Parent-Child Dysfunction  
563 interacted with either the socioeconomic risk or child behavioral dysregulation covariates, we  
564 first built a CCA models (one for socioeconomic risk, one for child behavioral dysregulation)  
565 with all possible covariate interactions. However, this builds large models that reduce our chance  
566 of finding real, significant association due to the number of terms. Therefore, before running a  
567 PERMANOVA test, we subjected each CCA object to model selection based on the Akaike  
568 Information Criterion (AIC) by stepwise addition or subtraction of terms (*ordistep* function;  
569 (72)). The model selected by this method was then analyzed using PERMANOVA to determine  
570 if there were significant associations between covariate interactions and the microbiome. All of  
571 these computational methods are available as supplemental data.

572 The above methods analyze the relationships between the covariates of interest and the  
573 overall composition of the microbiome (in terms of taxonomy and functional potential), but they  
574 may miss important relationships between covariates and individual taxa or microbial functions.  
575 To determine if such relationships exist in this data set we conducted pairwise regressions  
576 between the abundance of each taxa or KO and each socioeconomic risk and child behavioral  
577 dysregulation covariate. We included in each regression model the same demographic and gut-  
578 related terms to account for their variance as well. The regression method used was a compound  
579 Poisson generalized linear model (CPGLM; (73)), which uses a distribution that has a point mass  
580 over zero, allowing it to better handle the sparseness of functional and taxonomic community  
581 data (74). After all pairwise regressions, we adjusted the p-values using the False Discovery Rate  
582 (FDR) with a cutoff of  $q = 0.05$ . We then removed any pairs where the taxon or KO was absent  
583 from half of the samples or more and presented the results in Supplemental Tables 6 and 7.

584



585 **ACKNOWLEDGEMENTS**

586

587 This work was supported by a Hemera Foundation grant awarded to P.A.F., a National  
588 Science Foundation Graduate Research Fellowship [2015172132] to J.E.F.; its contents are  
589 solely the responsibility of the authors and do not necessarily represent the official views of the  
590 NIH. Hickey was supported by a postdoctoral fellowship funded by a grant to the BioBE Center  
591 from the Alfred P. Sloan Foundation. Stagaman was supported by the NIEHS Integrated  
592 Regional Training Program in Environmental Health Sciences grant (PI Robert L Tanguay, T32-  
593 ES007060-38).

594 We would like to thank Jessica Green and Clarisse Betancourt for project assistance,  
595 including DNA extraction and subject running. We would also like to thank Natalia Pachote and  
596 Adrienne Luba for assistance in project coordination and subject running.

597

598

599

600

601

602 **REFERENCES**

603

- 604 1. Mah VK, Ford-Jones EL (2012) Spotlight on middle childhood: Rejuvenating the  
605 ‘forgotten years.’ *Paediatr Child Health* 17(2):81–83.
- 606 2. Evans GW, Kim P (2010) Multiple risk exposure as a potential explanatory mechanism  
607 for the socioeconomic status-health gradient. *Ann N Y Acad Sci* 1186(1):174–189.
- 608 3. Sullivan RM, Perry RE (2015) Mechanisms and functional implications of social  
609 buffering in infants: Lessons from animal models. *Soc Neurosci* 10(5):500–511.
- 610 4. Fisher PA, Gunnar M (2010) Early life stress as a risk factor for disease in adulthood. *The*  
611 *Impact of Early Life Trauma on Health and Disease*, eds Lanius RA, Vermetten E, Pain C  
612 (Cambridge University Press, Cambridge), pp 133–141.
- 613 5. FISHER PA, GUNNAR MR, DOZIER M, BRUCE J, PEARS KC (2006) Effects of  
614 Therapeutic Interventions for Foster Children on Behavioral Problems, Caregiver  
615 Attachment, and Stress Regulatory Neural Systems. *Ann N Y Acad Sci* 1094(1):215–225.
- 616 6. Shonkoff JP (2017) Rethinking the Definition of Evidence-Based Interventions to  
617 Promote Early Childhood Development. *Pediatrics* 140(6):e20173136.
- 618 7. Bos K, et al. (2011) Psychiatric Outcomes in Young Children with a History of  
619 Institutionalization. *Harv Rev Psychiatry* 19(1):15–24.
- 620 8. Fisher PA, et al. (2016) The Neurobiology of Intervention and Prevention in Early  
621 Adversity. *Annu Rev Clin Psychol* 12(1):331–357.
- 622 9. Fisher PA, Frenkel TI, Noll LK, Berry M, Yockelson M (2016) Promoting Healthy Child  
623 Development via a Two-Generation Translational Neuroscience Framework: The Filming  
624 Interactions to Nurture Development Video Coaching Program. *Child Dev Perspect*  
625 10(4):251–256.
- 626 10. Shonkoff JP, Fisher PA (2013) Rethinking evidence-based practice and two-generation  
627 programs to create the future of early childhood policy. *Dev Psychopathol* 25(4pt2):1635–  
628 1653.
- 629 11. Dinan TG, Cryan JF (2016) Mood by microbe: towards clinical translation. *Genome Med*  
630 8(1):36.

- 631 12. Sharon G, Sampson TR, Geschwind DH, Mazmanian SK (2016) The Central Nervous  
632 System and the Gut Microbiome. *Cell* 167(4):915–932.
- 633 13. Borre YE, et al. (2014) Microbiota and neurodevelopmental windows: implications for  
634 brain disorders. *Trends Mol Med* 20(9):509–518.
- 635 14. Yatsunenکو T, et al. (2012) Human gut microbiome viewed across age and geography.  
636 *Nature* 486(7402):222–227.
- 637 15. Christian LM, et al. (2015) Gut microbiome composition is associated with temperament  
638 during early childhood. *Brain Behav Immun* 45:118–127.
- 639 16. Carlson AL, et al. (2018) Infant Gut Microbiome Associated With Cognitive  
640 Development. *Biol Psychiatry* 83(2):148–159.
- 641 17. Li Q, Han Y, Dy ABC, Hagerman RJ (2017) The Gut Microbiota and Autism Spectrum  
642 Disorders. *Front Cell Neurosci* 11. doi:10.3389/fncel.2017.00120.
- 643 18. Allen AP, Dinan TG, Clarke G, Cryan JF (2017) A psychology of the human brain-gut-  
644 microbiome axis. *Soc Personal Psychol Compass* 11(4):e12309.
- 645 19. Moussaoui N, et al. (2016) Limited Nesting Stress Alters Maternal Behavior and In Vivo  
646 Intestinal Permeability in Male Wistar Pup Rats. *PLoS One* 11(5):e0155037.
- 647 20. Miller GE, et al. (2016) Lower Neighborhood Socioeconomic Status Associated with  
648 Reduced Diversity of the Colonic Microbiota in Healthy Adults. *PLoS One*  
649 11(2):e0148952.
- 650 21. Bailey MT, Lubach GR, Coe CL (2004) Prenatal Stress Alters Bacterial Colonization of  
651 the Gut in Infant Monkeys. *J Pediatr Gastroenterol Nutr* 38(4):414–421.
- 652 22. Zijlmans MAC, Korpela K, Riksen-Walraven JM, de Vos WM, de Weerth C (2015)  
653 Maternal prenatal stress is associated with the infant intestinal microbiota.  
654 *Psychoneuroendocrinology* 53:233–245.
- 655 23. Øines E, Murison R, Mrdalj J, Grønli J, Milde AM (2012) Neonatal maternal separation in  
656 male rats increases intestinal permeability and affects behavior after chronic social stress.  
657 *Physiol Behav* 105(4):1058–1066.
- 658 24. Sharpton TJ (2014) An introduction to the analysis of shotgun metagenomic data. *Front*  
659 *Plant Sci* 5(June):1–14.
- 660 25. Roos LE, et al. (2017) Validation of autonomic and endocrine reactivity to a laboratory  
661 stressor in young children. *Psychoneuroendocrinology* 77:51–55.
- 662 26. Gaulke CA, Sharpton TJ (2018) The influence of ethnicity and geography on human gut  
663 microbiome composition. *Nat Med* 24(10):1495–1496.
- 664 27. Prideaux L, et al. (2013) Impact of Ethnicity, Geography, and Disease on the Microbiota  
665 in Health and Inflammatory Bowel Disease. *Inflamm Bowel Dis* 19(13):2906–2918.
- 666 28. He Y, et al. (2018) Regional variation limits applications of healthy gut microbiome  
667 reference ranges and disease models. *Nat Med* 24(10):1532–1535.
- 668 29. Deschasaux M, et al. (2018) Depicting the composition of gut microbiota in a population  
669 with varied ethnic origins but shared geography. *Nat Med* 24(10):1526–1531.
- 670 30. Mazmanian SK, Liu CH, Tzianabos AO, Kasper DL (2005) An Immunomodulatory  
671 Molecule of Symbiotic Bacteria Directs Maturation of the Host Immune System. *Cell*  
672 122(1):107–118.
- 673 31. Monk C, Georgieff MK, Osterholm EA (2013) Research review: maternal prenatal  
674 distress and poor nutrition - mutually influencing risk factors affecting infant  
675 neurocognitive development. *J Child Psychol Psychiatry* 54(2):115–30.
- 676 32. Goyal MS, Venkatesh S, Milbrandt J, Gordon JI, Raichle ME (2015) Feeding the brain

- 677 and nurturing the mind: Linking nutrition and the gut microbiota to brain development.  
678 *Proc Natl Acad Sci* 112(46):14105–14112.
- 679 33. Rook GAW, Raison CL, Lowry CA (2014) Microbial ‘old friends’, immunoregulation and  
680 socioeconomic status. *Clin Exp Immunol* 177(1):1–12.
- 681 34. Cong X, et al. (2016) The potential impact of gut on your health: Current status and future  
682 challenges. *Asian Pacific J Allergy Immunol* 89(3):299–308.
- 683 35. Rosenfeld CS (2017) Gut Dysbiosis in Animals Due to Environmental Chemical  
684 Exposures. *Front Cell Infect Microbiol* 7:396.
- 685 36. Aldao A, Gee DG, De Los Reyes A, Seager I (2016) Emotion regulation as a  
686 transdiagnostic factor in the development of internalizing and externalizing  
687 psychopathology: Current and future directions. *Dev Psychopathol* 28(4pt1):927–946.
- 688 37. Mazmanian SK, Round JL, Kasper DL (2008) A microbial symbiosis factor prevents  
689 intestinal inflammatory disease. *Nature* 453(7195):620–625.
- 690 38. Kelly D, et al. (2004) Commensal anaerobic gut bacteria attenuate inflammation by  
691 regulating nuclear-cytoplasmic shuttling of PPAR- $\gamma$  and RelA. *Nat Immunol* 5(1):104–  
692 112.
- 693 39. Vlainić J, Šuran J, Vlainić T, Letizia Vukorep A (2016) Probiotics as an Adjuvant  
694 Therapy in Major Depressive Disorder. *Curr Neuropharmacol* 14(8):952–958.
- 695 40. Evrensel A, Ceylan ME (2018) Gut-Microbiota-Brain Axis and Depression.  
696 *Understanding Depression* (Springer Singapore, Singapore), pp 197–207.
- 697 41. Louis P, Flint HJ (2017) Formation of propionate and butyrate by the human colonic  
698 microbiota. *Environ Microbiol* 19(1):29–41.
- 699 42. Kostic AD, Xavier RJ, Gevers D (2014) The microbiome in inflammatory bowel disease:  
700 Current status and the future ahead. *Gastroenterology* 146(6):1489–1499.
- 701 43. Logan SL, et al. (2018) The *Vibrio cholerae* type VI secretion system can modulate host  
702 intestinal mechanics to displace gut bacterial symbionts. *Proc Natl Acad Sci*  
703 115(16):E3779–E3787.
- 704 44. Sana TG, et al. (2016) *Salmonella Typhimurium* utilizes a T6SS-mediated antibacterial  
705 weapon to establish in the host gut. *Proc Natl Acad Sci* 113(34):E5044–E5051.
- 706 45. Ma AT, Mekalanos JJ (2010) In vivo actin cross-linking induced by *Vibrio cholerae* type  
707 VI secretion system is associated with intestinal inflammation. *Proc Natl Acad Sci*  
708 107(9):4365–4370.
- 709 46. Schwarz S, Hood RD, Mougous JD (2010) What is type VI secretion doing in all those  
710 bugs? *Trends Microbiol* 18(12):531–537.
- 711 47. Chatzidaki-Livanis M, Geva-Zatorsky N, Comstock LE (2016) *Bacteroides fragilis* type  
712 VI secretion systems use novel effector and immunity proteins to antagonize human gut  
713 Bacteroidales species. *Proc Natl Acad Sci* 113(13):3627–3632.
- 714 48. Clarke G, et al. (2013) The microbiome-gut-brain axis during early life regulates the  
715 hippocampal serotonergic system in a sex-dependent manner. *Mol Psychiatry* 18(6):666–  
716 673.
- 717 49. Clarke G, et al. (2013) The microbiome-gut-brain axis during early life regulates the  
718 hippocampal serotonergic system in a sex-dependent manner. *Mol Psychiatry* 18(6):666–  
719 673.
- 720 50. O’Mahony SM, Clarke G, Borre YE, Dinan TG, Cryan JF (2015) Serotonin, tryptophan  
721 metabolism and the brain-gut-microbiome axis. *Behav Brain Res* 277:32–48.
- 722 51. Wikoff WR, et al. (2009) Metabolomics analysis reveals large effects of gut microflora on

- 723 mammalian blood metabolites. *Proc Natl Acad Sci* 106(10):3698–3703.
- 724 52. Foster JA, McVey Neufeld K-A (2013) Gut–brain axis: how the microbiome influences  
725 anxiety and depression. *Trends Neurosci* 36(5):305–312.
- 726 53. Liu R, et al. (2017) Gut microbiome and serum metabolome alterations in obesity and  
727 after weight-loss intervention. *Nat Med* 23(7):859–868.
- 728 54. Ding HT, Taur Y, Walkup JT (2017) Gut Microbiota and Autism: Key Concepts and  
729 Findings. *J Autism Dev Disord* 47(2):480–489.
- 730 55. Yu J, et al. (2017) Metagenomic analysis of faecal microbiome as a tool towards targeted  
731 non-invasive biomarkers for colorectal cancer. *Gut* 66(1):70–78.
- 732 56. Yamamoto T, Shimoyama T, Kuriyama M (2017) Dietary and enteral interventions for  
733 Crohn’s disease. *Curr Opin Biotechnol* 44:69–73.
- 734 57. Meldrum BS (2000) Glutamate as a neurotransmitter in the brain: review of physiology  
735 and pathology. *J Nutr* 130(4S Suppl):1007S–15S.
- 736 58. Oldendorf W (1971) Brain uptake of radiolabeled amino acids, amines, and hexoses after  
737 arterial injection. *Am J Physiol Content* 221(6):1629–1639.
- 738 59. Yudkoff M (2017) Interactions in the Metabolism of Glutamate and the Branched-Chain  
739 Amino Acids and Ketoacids in the CNS. *Neurochem Res* 42(1):10–18.
- 740 60. Souba WW, et al. (1990) The role of glutamine in maintaining a healthy gut and  
741 supporting the metabolic response to injury and infection. *J Surg Res* 48(4):383–391.
- 742 61. Work WC, Cowen EL, Parker GR, Wyman PA (1990) Stress resilient children in an urban  
743 setting. *J Prim Prev* 11(1):3–17.
- 744 62. Rothbart MK, Ahadi SA, Hershey KL, Fisher P (2001) Investigations of Temperament at  
745 Three to Seven Years: The Children’s Behavior Questionnaire. *Child Dev* 72(5):1394–  
746 1408.
- 747 63. Achenbach TM (1991) Manual for the Child Behavior Check- list/4–18 and 1991 Profiles.  
748 *J Abnorm Child Psychol* 15:629–650.
- 749 64. Abidin RR (1995) The parenting stress index (3rd ed.). *Forensic Uses Clin Assess*  
750 *Instruments*. doi:10.4324/9780203726587.
- 751 65. Duncan LG (2007) Assessment of mindful parenting among parents of early adolescents:  
752 Development and validation of the Interpersonal Mindfulness in Parenting scale.  
753 Available at: <https://etda.libraries.psu.edu/catalog/7740> [Accessed October 15, 2018].
- 754 66. Baer RA, Smith GT, Hopkins J, Krietemeyer J, Toney L (2006) Using Self-Report  
755 Assessment Methods to Explore Facets of Mindfulness. *Assessment* 13(1):27–45.
- 756 67. Sharpton TJ (2017) A high-throughput and modular workflow to quality control shotgun  
757 metagenomic DNA sequence libraries.
- 758 68. Huttenhower C, et al. (2012) Structure, function and diversity of the healthy human  
759 microbiome. *Nature* 486(7402):207–214.
- 760 69. Truong DT, et al. (2015) MetaPhlan2 for enhanced metagenomic taxonomic profiling.  
761 *Nat Methods* 12(10):902–903.
- 762 70. R Core Team (2015) R: A Language and Environment for Statistical Computing.  
763 Available at: <https://www.r-project.org/>.
- 764 71. McMurdie PJ, Holmes S (2013) phyloseq: An R Package for Reproducible Interactive  
765 Analysis and Graphics of Microbiome Census Data. *PLoS One* 8(4):e61217.
- 766 72. Oksanen J, et al. (2016) vegan: Community Ecology Package. Available at: [https://cran.r-](https://cran.r-project.org/package=vegan)  
767 [project.org/package=vegan](https://cran.r-project.org/package=vegan).
- 768 73. Zhang Y (2018) cplm: Compound Poisson Linear Models. Available at: <https://cran.r->

769 project.org/package=cplm.  
770 74. Sharpton T, et al. (2017) Development of Inflammatory Bowel Disease Is Linked to a  
771 Longitudinal Restructuring of the Gut Metagenome in Mice. *mSystems* 2(5):e00036-17.  
772





774 **TABLES AND FIGURES**

775

Table 1. The set of covariates selected by *envfit* analysis for both taxonomic- and functional-based microbiome composition. All metrics are reported via questionnaire by the parent. PSI, Parenting Stress Index; LEC, Life Events Checklist; CBQ, Children's Behavior Questionnaire; CBCL Child Behavior Checklist

| <b>Covariate Category</b> | <b>Covariate</b>             | <b>Description</b>                                                                                                           |
|---------------------------|------------------------------|------------------------------------------------------------------------------------------------------------------------------|
| Parental Stress           | PSI Parent-Child Dysfunction | Severity of dysfunctional interactions between parent and child                                                              |
| Socioeconomic Risk        | LEC Poverty Related Events   | Number of self-reported stressful life events associated to poverty                                                          |
|                           | LEC Turmoil                  | Number of self-reported stressful life events associated with family turmoil                                                 |
|                           | LEC Total                    | Total number of self-reported stressful life events                                                                          |
|                           | Income to Needs              | Ratio of yearly household income to federal income needs per number of people supported by that income                       |
| Child Behavioral Symptoms | CBQ Impulsivity              | Speed of response initiation                                                                                                 |
|                           | CBQ Inhibitory Control       | The capacity to plan and to suppress inappropriate approach responses under instructions or in novel or uncertain situations |
|                           | CBCL Depressive Problems     | A subscale of the CBCL containing items associated with depression                                                           |
| Demography                | Child Race/Ethnicity         | Parent report of child's racial and ethnic background                                                                        |
| Gut-related History       | Geographic Locations         | Lived in a different state or country >3 months                                                                              |

776

777



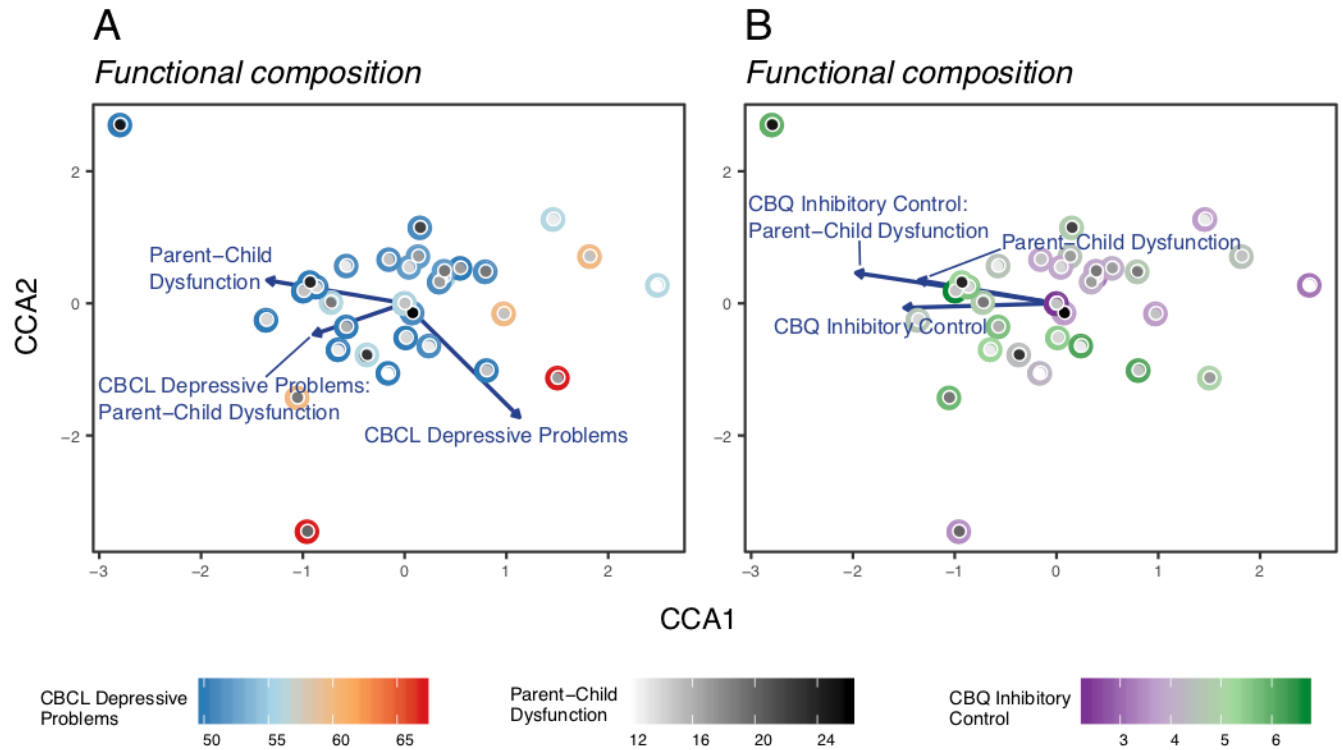

793  
794

Figure 2

795 **Figure 2.** CCA ordinations for functional composition of the microbiome, behavioral  
796 dysregulation, and caregiver behavior covariates. Only covariates that have significant main  
797 effects or are part of a significant interaction are depicted in each ordination. Significance was  
798 assessed by PERMANOVA ( $\alpha = 0.05$ ), see Supp. Tables 4 & 5 for statistical results. **(A)**  
799 Ordination of functional (KO-level) composition. Each point represents a sample and consists of  
800 two parts: the color of the outer circle corresponds to the sample's Depressive Problems score;  
801 the inner circle is shaded from white to black indicating the sample's Parent-Child Dysfunction  
802 score. **(B)** Ordination of functional (KO-level) composition, sample locations are identical to  
803 panel A. In this panel the outer circle of the point is colored according of the sample's Inhibitory  
804 Control score. The inner circle is shaded identically to panel A.  
805

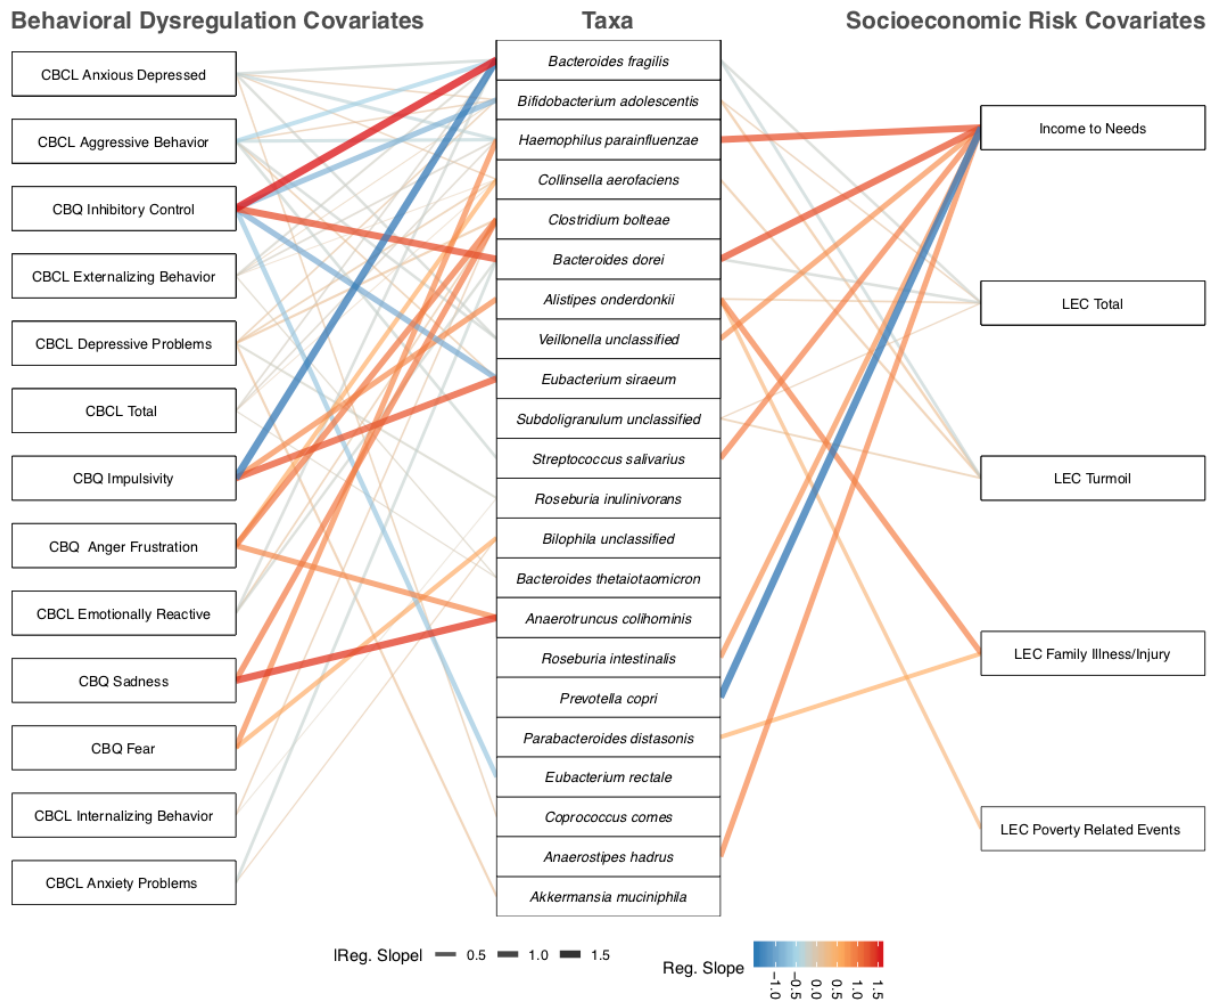

806  
807

Figure 3

808 **Figure 3.** A network representing statistically significant pairwise associations, according to  
809 generalized linear models, between individual taxa and behavioral dysregulation or  
810 socioeconomic risk covariates. The left column shows individual behavioral dysregulation. The  
811 central column shows individual taxa identified to the species level. The right column shows  
812 individual socioeconomic risk covariates. Lines are only drawn between a covariate and a taxon  
813 if there is a significant relationship. The color of the line represents whether the association  
814 between the covariate and taxon is negative (blue) or positive (red). The width and intensity of  
815 the line color represents the slope of the regression line that describes the association (steeper  
816 regression lines are wider and brighter).  
817



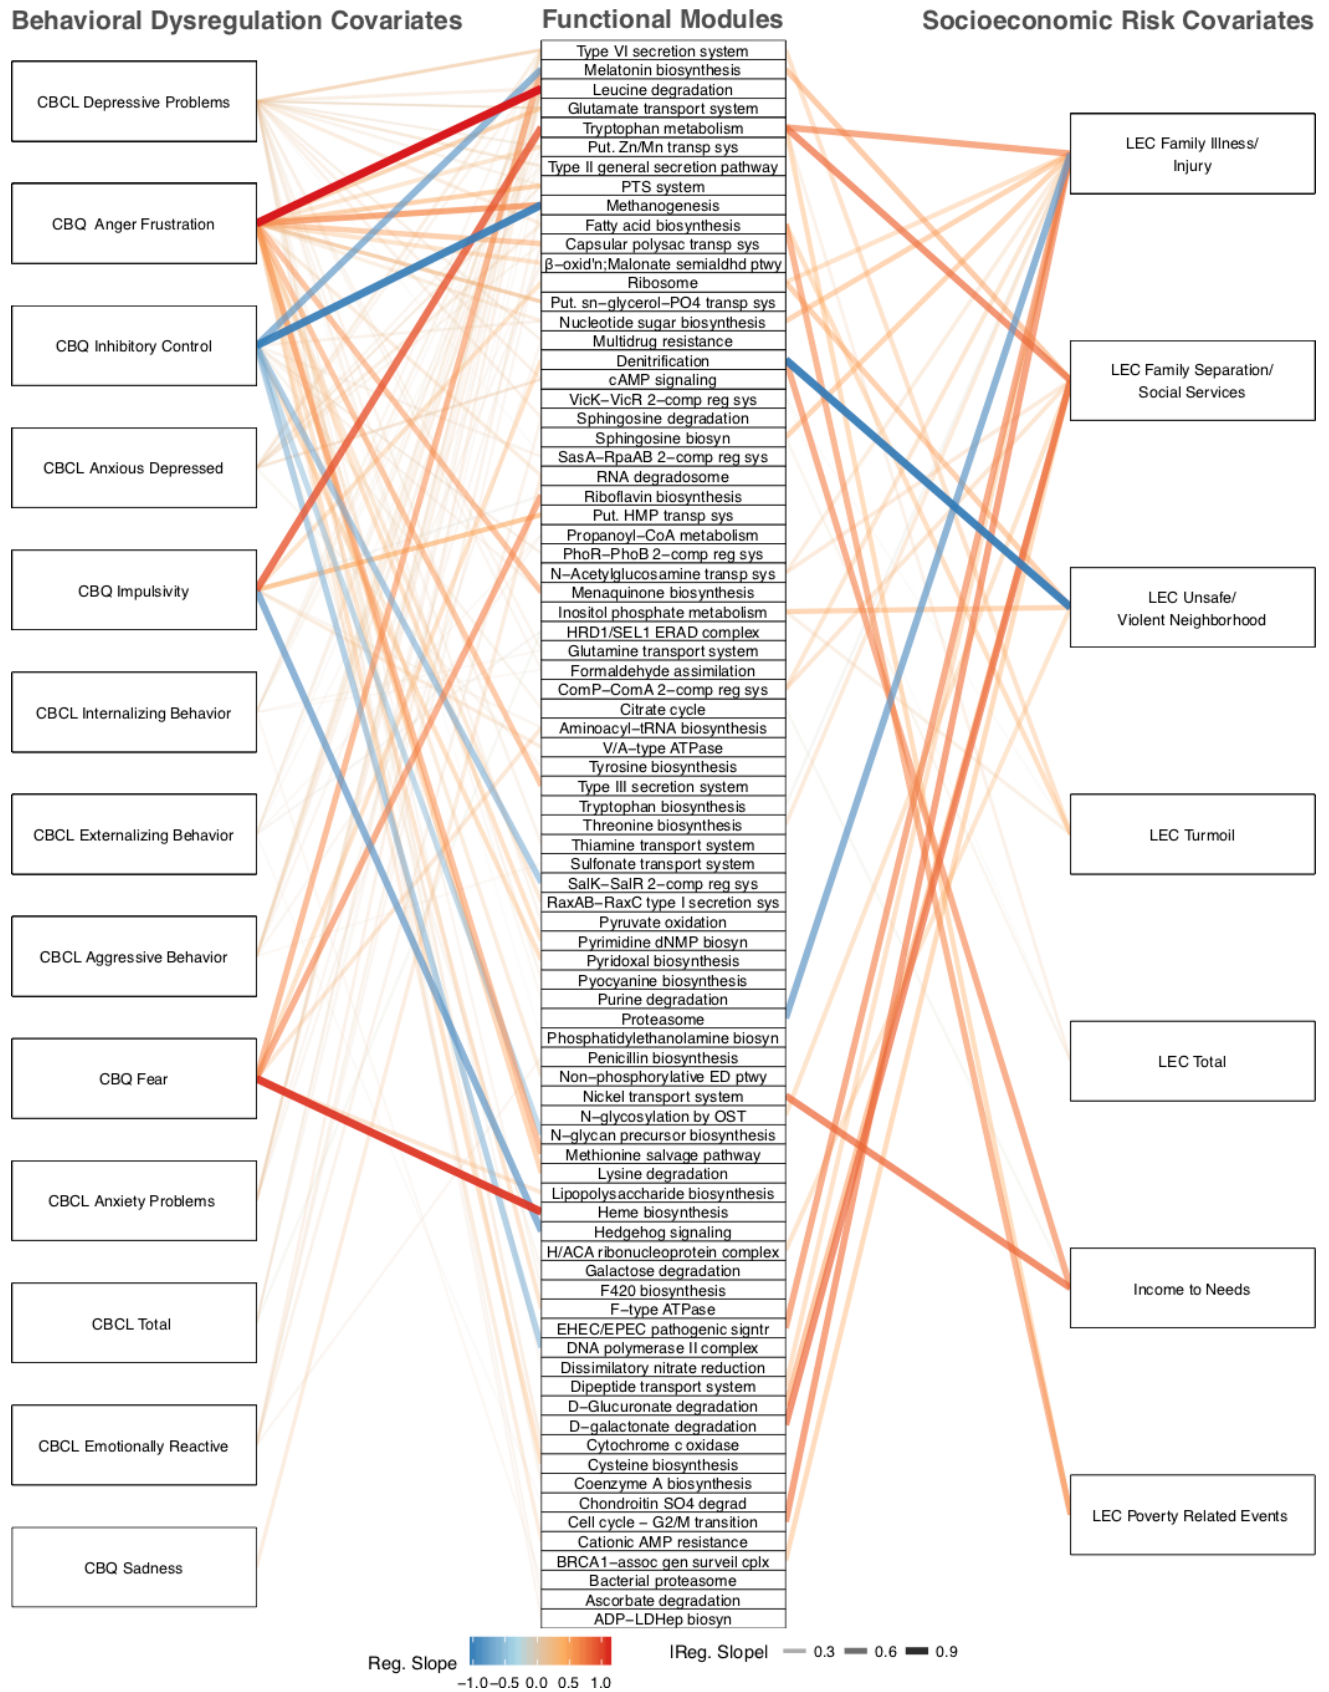

820 Figure 4. A network representing statistically significant pairwise associations, according to  
821 generalized linear models, between individual KOs (grouped into modules) and behavioral  
822 dysregulation or socioeconomic risk covariates. The left column shows individual behavioral  
823 dysregulation. The central column shows functional groups assigned at the KEGG module level.  
824 The right column shows individual socioeconomic risk covariates. Lines are only drawn between  
825 a covariate and a module if there is a significant relationship. The color of the line represents  
826 whether the association between the covariate and module is negative (blue) or positive (red).  
827 The width and intensity of the line color represents the slope of the regression line that describes  
828 the association (steeper regression lines are wider and brighter).  
829  
830  
831

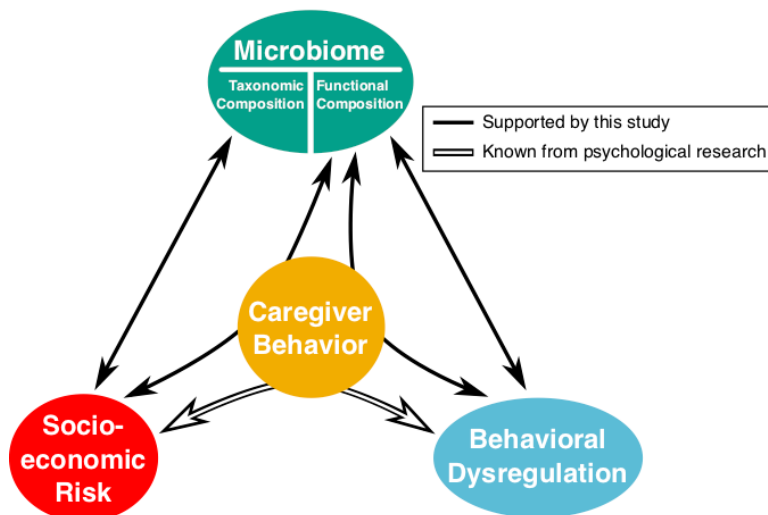

832  
833 *Figure 5*

834 Figure 5. This figure illustrates the results of our hypothesis testing using ordination-based  
835 analyses. White solid arrows indicate relationships supported by evidence from prior  
836 psychological research. The black arrows represent relationship between the covariate categories  
837 and composition (taxonomic or functional) of the gut microbiome, as determined by our  
838 ordination- and PERMANOVA-based analysis (see Supp. Tables 2-5). Straight arrows represent  
839 significant main effects between the microbiome and a covariate category (e.g. between  
840 Socioeconomic Risk and taxonomic composition of the microbiome). Arrows that curve through  
841 Caregiver Behavior indicate that there is a significant interaction between Caregiver Behavior  
842 and the other covariate category (e.g. our analysis revealed two significant interactions between  
843 Socioeconomic Risk and Caregiver Behavior in their association with the functional composition  
844 of the microbiome).

845  
846

847 SUPPLEMENTAL TABLES AND FIGURES  
848

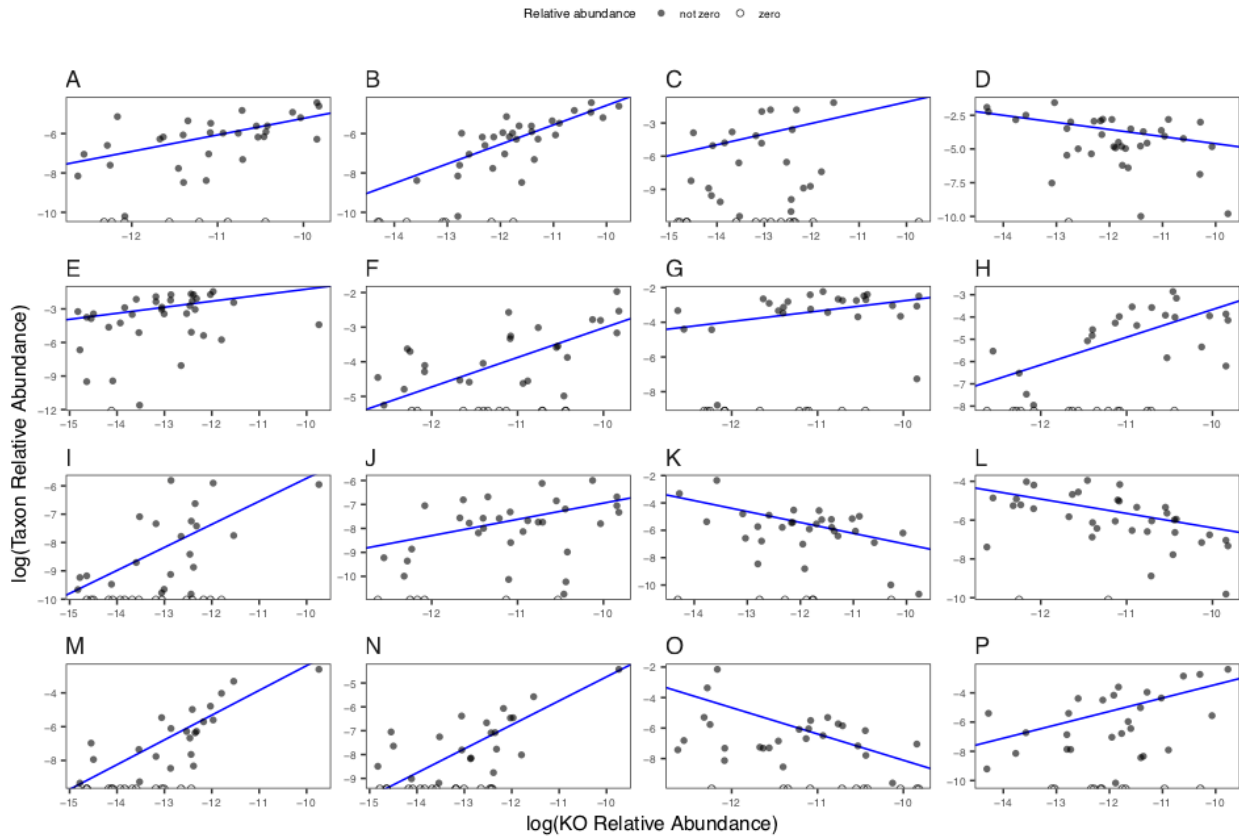

| Panel | Taxon                             | KO     |
|-------|-----------------------------------|--------|
| A     | <i>Collinsella aerofaciens</i>    | K01058 |
| B     | <i>Collinsella aerofaciens</i>    | K01220 |
| C     | <i>Bacteroides dorei</i>          | K11910 |
| D     | <i>Bacteroides ovatus</i>         | K01220 |
| E     | <i>Bacteroides uniformis</i>      | K11910 |
| F     | <i>Parabacteroides merdae</i>     | K01058 |
| G     | <i>Alistipes putredinis</i>       | K01058 |
| H     | <i>Alistipes shahii</i>           | K01058 |
| I     | <i>Clostridium bolteae</i>        | K11910 |
| J     | <i>Lachnospiraceae</i> 7 1 58FAA  | K01058 |
| K     | <i>Roseburia hominis</i>          | K01220 |
| L     | <i>Roseburia inulinivorans</i>    | K01058 |
| M     | <i>Escherichia coli</i>           | K11910 |
| N     | <i>Escherichia unclassified</i>   | K11910 |
| O     | <i>Haemophilus parainfluenzae</i> | K01058 |
| P     | <i>Akkermansia muciniphila</i>    | K01220 |

| KO     | Label                                                                                                                                                                                                                                                                                     |
|--------|-------------------------------------------------------------------------------------------------------------------------------------------------------------------------------------------------------------------------------------------------------------------------------------------|
| K01058 | KO: pldA<br>phospholipase A1/A2 [EC:3.1.1.32 3.1.1.4]<br>PFAMS: Phospholipase A1<br>Type VI secretion system VasI                                                                                                                                                                         |
|        | EvIG                                                                                                                                                                                                                                                                                      |
|        | VC_A0118                                                                                                                                                                                                                                                                                  |
|        | Tetratricopeptide repeat                                                                                                                                                                                                                                                                  |
|        | MIT (microtubule interacting and transport) domain                                                                                                                                                                                                                                        |
|        | Aida N-terminus                                                                                                                                                                                                                                                                           |
| K01220 | KO: E3.2.1.85, lacG<br>6-phospho-beta-galactosidase [EC:3.2.1.85]<br>PFAMS: Glycosyl hydrolase family 1<br>Type VI secretion protein lcmF C-terminal<br>Cellulase (glycosyl hydrolase family 5)<br>Glycosyl hydrolase family 10<br>Uncharacterized protein conserved in archaea (DUF2095) |
|        | K11903 MODS: Type VI secretion system                                                                                                                                                                                                                                                     |
|        | K11906 MODS: Type VI secretion system                                                                                                                                                                                                                                                     |
|        | K11910 MODS: Type VI secretion system                                                                                                                                                                                                                                                     |

849  
850 Supplemental Figure 1

851 Supplemental Figure 1. Each panel (A-P) is a scatter plot of the relative abundance of a single  
852 KO (x-axis, log-transformed) and the relative abundance of an individual taxon (y-axis, log  
853 transformed). The blue lines represent the CPGLM regression line as fit to the data. Filled circles  
854 represent taxon abundances that were greater than zero before log transformation, and open

855 circles represent taxon abundances that were zero before log transformation. The table on the left  
856 details the KO-taxon pair used in each panel, and the table on the right gives the descriptive  
857 name of each KO identification number.

858  
859

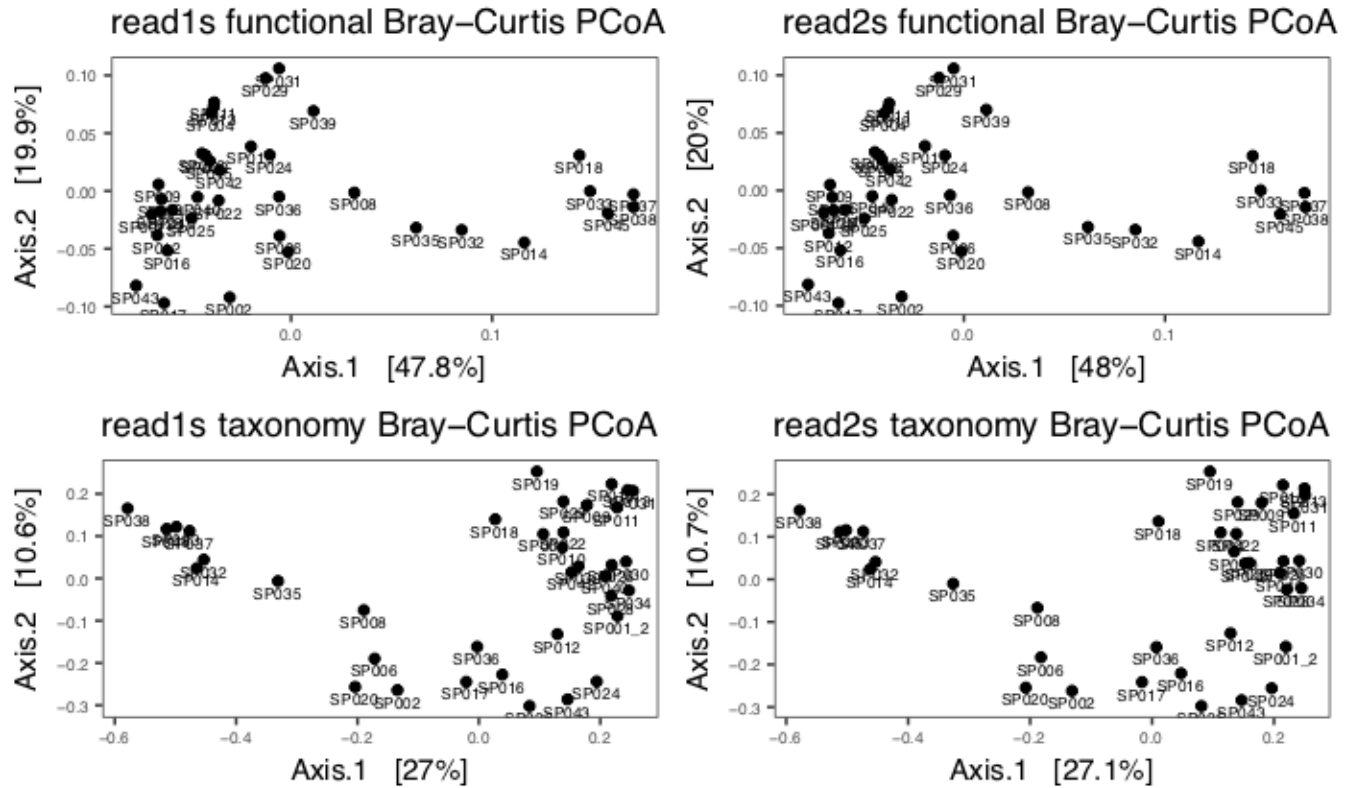

860  
861 *Supplemental Figure 2*

862 Supplemental Figure 2. Principal Coordinate Analysis ordinations for the metagenomic data. The  
863 top two panels were created using the KO-annotated sequences for the read1 (left) and read2  
864 (right) data. The bottom two panels were created using the taxon-annotated sequences for the  
865 read1 (left) and read2 (right) data. The percentages in brackets along each axis represent the total  
866 variance explained by that axis. All distances were measured using the Bray-Curtis dissimilarity.  
867  
868

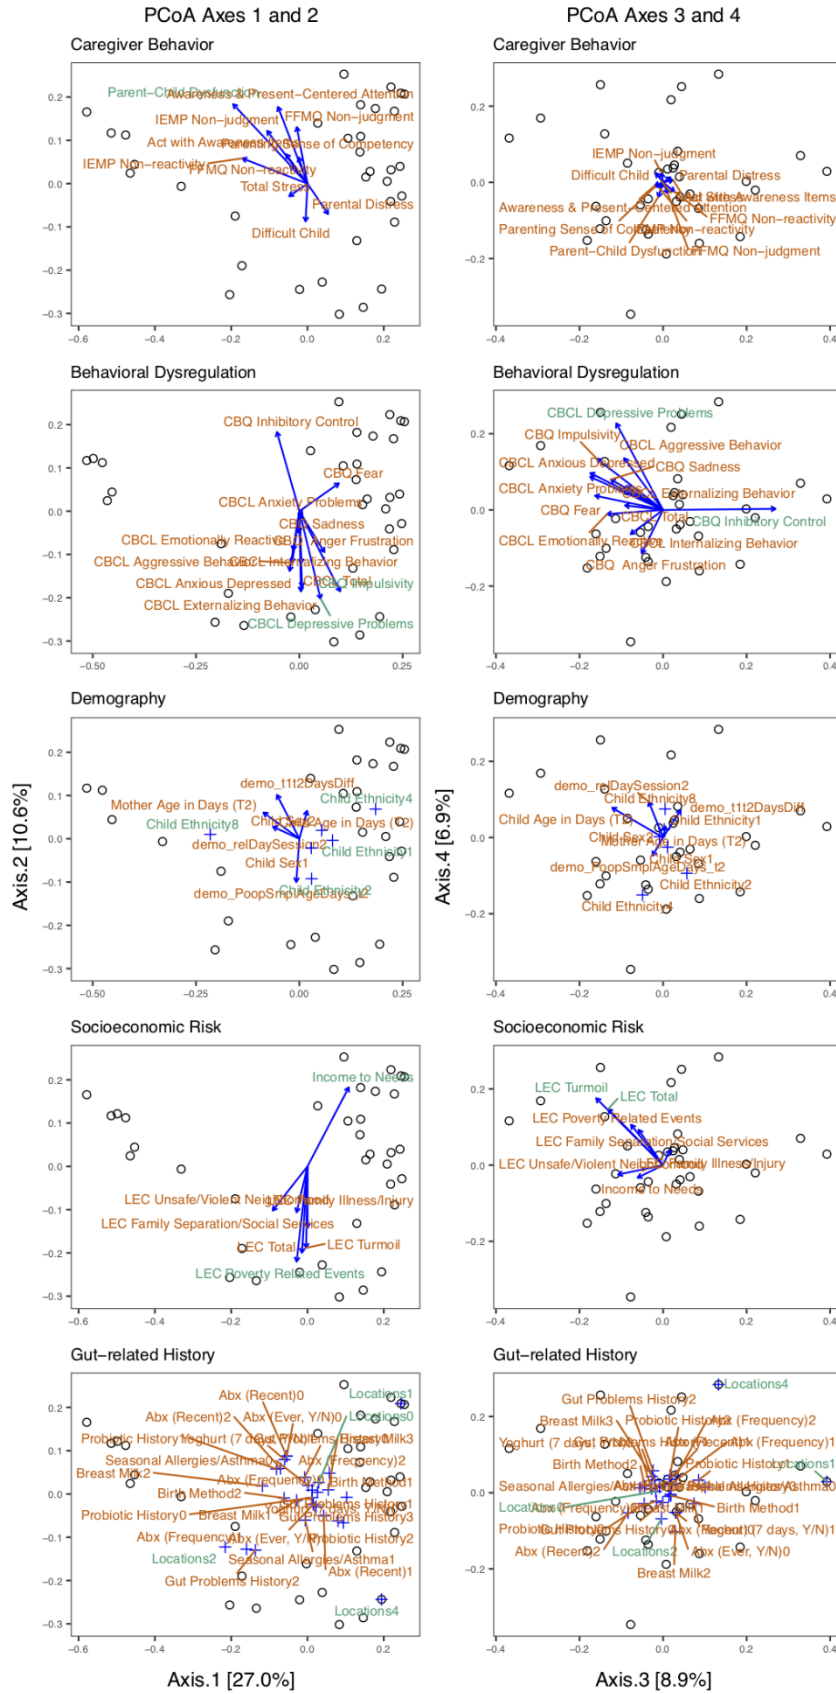

869  
870

Supplemental Figure 3



871 Supplemental Figure 3. The results of the envfit analysis for each category of covariates (each  
872 row of panels corresponds to an analysis within a single category) on the taxonomy-based PCoA  
873 ordinations. The panels on the left show the first and second axes of each ordination and the  
874 panels on the right show the third and fourth axes of each ordination.

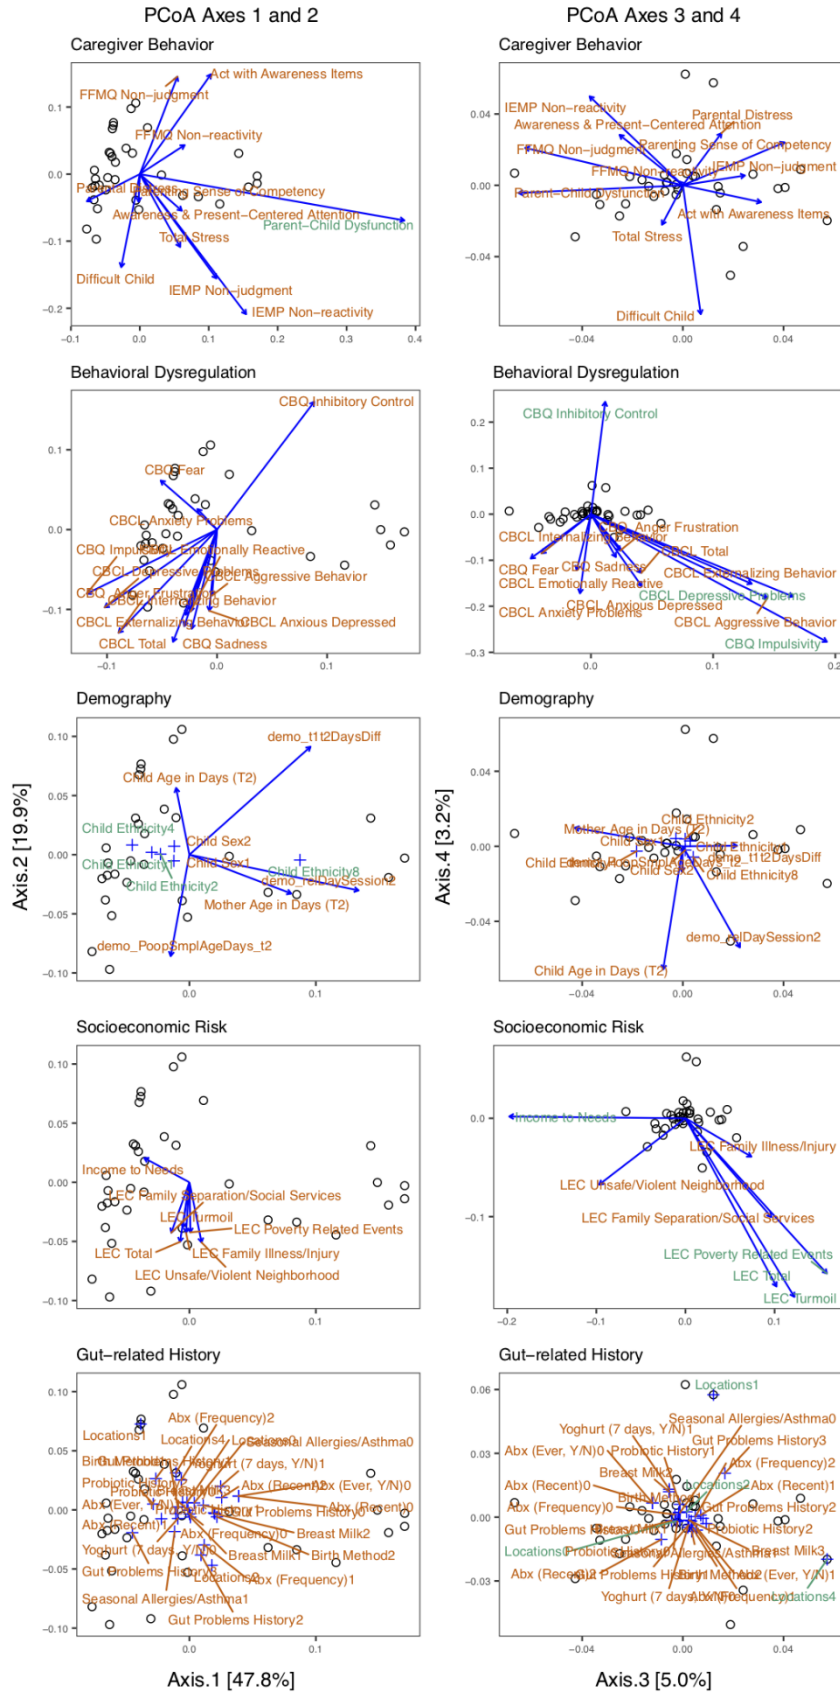

875  
876

Supplemental Figure 4

877 Supplemental Figure 4. The results of the *envfit* analysis for each category of covariates (each  
 878 row of panels corresponds to an analysis within a single category) on the functional group-based  
 879 PCoA ordinations. The panels on the left show the first and second axes of each ordination and  
 880 the panels on the right show the third and fourth axes of each ordination.

881  
 882

883 Supplemental Table 1 is a dataset provided as a separate file.

884

Supplemental Table 2. Results of PERMANOVA analysis on AIC-selected covariates within Socioeconomic Risk and Caregiver Behavior (including interactions) and their relationship with the taxonomic-based composition of the microbiome.

|                                                      | Df | ChiSquare | F     | Pr(>F) |   |
|------------------------------------------------------|----|-----------|-------|--------|---|
| LEC Turmoil                                          | 1  | 0.216     | 1.611 | 0.009  | * |
| LEC Poverty Related Events                           | 1  | 0.136     | 1.01  | 0.458  |   |
| Parent-Child Dysfunction                             | 1  | 0.131     | 0.973 | 0.495  |   |
| LEC Turmoil:Parent-Child Dysfunction                 | 1  | 0.177     | 1.319 | 0.126  |   |
| LEC Poverty Related Events :Parent-Child Dysfunction | 1  | 0.186     | 1.386 | 0.073  |   |
| Residual                                             | 21 | 2.822     |       |        |   |

885

Supplemental Table 3. Results of PERMANOVA analysis on AIC-selected covariates within Socioeconomic Risk and Caregiver Behavior (including interactions) and their relationship with the functional group-based composition of the microbiome.

|                                                      | Df | ChiSquare | F     | Pr(>F) |   |
|------------------------------------------------------|----|-----------|-------|--------|---|
| LEC Poverty Related Events                           | 1  | 0.003     | 1.222 | 0.226  |   |
| LEC Turmoil                                          | 1  | 0.004     | 1.433 | 0.139  |   |
| Income to Needs                                      | 1  | 0.004     | 1.483 | 0.113  |   |
| Parent-Child Dysfunction                             | 1  | 0.005     | 1.763 | 0.069  |   |
| LEC Poverty Related Events :Parent-Child Dysfunction | 1  | 0.004     | 1.574 | 0.108  |   |
| LEC Turmoil:Parent-Child Dysfunction                 | 1  | 0.007     | 2.506 | 0.01   | * |
| Income to Needs:Parent-Child Dysfunction             | 1  | 0.005     | 1.859 | 0.041  | * |
| Residual                                             | 19 | 0.054     |       |        |   |

886

Supplemental Table 4. Results of PERMANOVA analysis on AIC-selected covariates within Behavioral dysregulation and Caregiver Behavior (including interactions) and their relationship with the taxonomic-based composition of the microbiome.

|                          | Df | ChiSquare | F     | Pr(>F) |
|--------------------------|----|-----------|-------|--------|
| CBCL Depressive Problems | 1  | 0.206     | 1.485 | 0.071  |
| Parent-Child Dysfunction | 1  | 0.135     | 0.973 | 0.489  |
| Residual                 | 24 | 3.328     |       |        |

887

888  
889  
890  
891  
892

Supplemental Table 5. Results of PERMANOVA analysis on AIC-selected covariates within Behavioral dysregulation and Caregiver Behavior (including interactions) and their relationship with the functional group-based composition of the microbiome.

|                                                   | Df | ChiSquare | F     | Pr(>F) |   |
|---------------------------------------------------|----|-----------|-------|--------|---|
| CBQ Impulsivity                                   | 1  | 0.005     | 1.717 | 0.064  |   |
| CBQ Inhibitory Control                            | 1  | 0.004     | 1.589 | 0.085  |   |
| CBCL Depressive Problems                          | 1  | 0.006     | 2.035 | 0.035  | * |
| Parent-Child Dysfunction                          | 1  | 0.004     | 1.459 | 0.136  |   |
| CBQ Impulsivity:Parent-Child Dysfunction          | 1  | 0.003     | 1.039 | 0.373  |   |
| CBQ Inhibitory Control:Parent-Child Dysfunction   | 1  | 0.006     | 2.198 | 0.041  | * |
| CBCL Depressive Problems:Parent-Child Dysfunction | 1  | 0.007     | 2.687 | 0.007  | * |
| Residual                                          | 19 | 0.053     |       |        |   |

893  
894  
895  
896  
897

Supplemental Table 6 is a dataset provided as a separate file.

Supplemental Table 7 is a dataset provided as a separate file.

Supplemental Table 8. R-squared values and p-values from Procrustes analyses comparing the ordinations based on taxonomic or functional group composition, and between read1 and read2 sequencing data.

| Read comp. | Type comp.    | R <sup>2</sup> | p-value  |
|------------|---------------|----------------|----------|
| 1 vs. 2    | KOs vs. KOs   | 0.9997         | 1.00E-04 |
|            | Taxa vs. Taxa | 0.9973         | 1.00E-04 |
| 1 vs. 1    | KOs vs. Taxa  | 0.8375         | 1.00E-04 |
| 2 vs. 2    |               | 0.8364         | 1.00E-04 |

898  
899  
900  
901  
902

## SUPPLEMENTAL METHODS

### Sample Collection

903 A subsample of families from a larger study conducted in the Stress Neurobiology and  
904 Prevention laboratory were asked to participate in a follow-up study to collect a child gut  
905 microbial sample via at home stool collection. Parents were instructed to wait to collect sample  
906 at least 2-4 weeks following antibiotic use or illness; no current stool irregularities, no

907 anticipated stressors, and during a week with a typical diet. Recruitment was pre-determined to  
908 be complete once we reached 40 completed samples. Forty-five families consented to be in the  
909 study; five families did not complete the stool sample; one sample was determined to be lost in  
910 the mail, one child remained within the window of recent antibiotic use and illness through the  
911 duration of the study, one child changed their mind about participating, and two families  
912 continued to express interest in completing the sample but did not return a sample. Two  
913 experimenters went to the family's home. Parents provided consented and children provided  
914 assent. A visual depiction of the study (coloring book) was used to ensure child understood the  
915 study. During the home visit, parents filled out questionnaires and parents were instructed to  
916 collect a stool sample from their child a week after the visit using Genotek OmiGene kits (DNA  
917 Genotek, Ottawa, ON, Canada). This procedure allowed families to mail the sample in after  
918 collection without sample degradation. This was important to reach a broad range of  
919 socioeconomic backgrounds and to eliminate variability in post-collection procedures across the  
920 sample. The experimenter provided a collection demonstration with a toilet seat and playdough  
921 for parent to collect the sample from their child a week after the visit. In the week prior to  
922 collection, parents were asked to fill out a daily diary of basic food categories the child ate at  
923 breakfast, lunch, and dinner. Notably, parent's knowledge of child's daily diet was variable  
924 depending on child's enrollment in subsidized lunch at school and mother's work schedule.  
925 Families were compensated for their time at the home visit and again after receiving the stool  
926 sample.

927

#### 928 Important Runtime Parameters

929

930 `shotcleaner.pl`

931       Output format [-of]: fastq

932       Bowtie database name [-n]: all\_GRCh38.p7

933

934 `shotmap.pl`

935       Shotmap database [-d]: KEGG\_021515\_1M

936       Class score [--class-score]: 34

937       [--ags-method]: none

938

#### 939 Analysis in R

940

##### 941 *Data processing*

942

943       Functional and taxonomic community tables were built using relative abundances and  
944 associated with the sample metadata using the package phyloseq. All participants' (mothers and  
945 children) ages were calculated *in days* from their date of birth to the date of the second session,  
946 when stool samples were collected.

947       We had both the forward and reverse reads for each sequence. We conducted a Procrustes  
948 analysis on PCoA ordinations based on the Bray-Curtis dissimilarities to determine if there was a  
949 significant correlation between the two read sets for both the functional and taxonomic reads. For  
950 both functional and taxonomic reads, the correlation coefficients between the forward and  
951 reverse read based ordinations was greater than 0.99 and statistically significant ( $p = 0.0001$ ).  
952 We therefore continued with the remainder of the analyses using only the forward reads.



953

954 *Covariate reduction*

955

956       Within each covariate category (ESA, child behavior, parenting, demography, and gut-  
957 related history), we used the *envfit* function from the *vegan* package to determine which  
958 covariates (e.g., ESA covariates include LEC Poverty Related Events and LEC Turmoil; child  
959 behavior covariates include CBQ Impusivity and CBQ Inhibitory Control) explained a  
960 significant proportion of microbiome diversity along any of the first four PCoA axes (same  
961 PCoA ordination generated in the Data Processing section above; Supplemental Figures 3 & 4).

962

963       The code used to conduct all analyses can be found at

964 [https://github.com/kstagaman/flannery\\_stagaman\\_analysis](https://github.com/kstagaman/flannery_stagaman_analysis).

965

966       All metagenome data can be found at

967 <https://www.ncbi.nlm.nih.gov/sra/?term=PRJNA496479>

968 <https://www.ncbi.nlm.nih.gov/Traces/study/?acc=PRJNA496479>
